# Supplementary material for: Combined experimental and computational study of the photoabsorption of the monodoped and nondoped nanoclusters Au24Pt(SR)18, Ag24Pt(SR)18, and Ag25(SR)18
Source: Royal Society of Chemistry journal article supplement (doi:10.1039/d4cp00789a), 2024-01-01
Supplement: d4cp00789a1.pdf [file d4cp00789a1.pdf]

**SUPPORTING INFORMATION FOR:**

**Combined Experimental and Computational  
Study of the Photoabsorption of the  
Monodoped and Nondoped Nanoclusters  
 $\text{Au}_{24}\text{Pt}(\text{SR})_{18}$ ,  $\text{Ag}_{24}\text{Pt}(\text{SR})_{18}$ , and  $\text{Ag}_{25}(\text{SR})_{18}$**

Pierpaolo D'Antoni<sup>1</sup>, Luca Sementa<sup>2</sup>, Sara Bonacchi<sup>3</sup>, Mattia Reato,<sup>3</sup> Flavio Maran<sup>3,4\*</sup>, Alessandro Fortunelli<sup>2\*</sup>, and Mauro Stener<sup>1\*</sup>

<sup>1</sup>*Dipartimento di Scienze Chimiche e Farmaceutiche, Università di Trieste, Via Giorgieri 1, I-34127 Trieste, Italy*

<sup>2</sup>*CNR-ICCOM & IPCF, Consiglio Nazionale delle Ricerche, via Giuseppe Moruzzi 1, I-56124 Pisa, Italy*

<sup>3</sup>*University of Padova, Department of Chemistry, Via Marzolo 1, I-35131 Padova, Italy*

<sup>4</sup>*Department of Chemistry, University of Connecticut, 55 North Eagleville Road, Storrs, Connecticut 06269, United States*

AgNO<sub>3</sub> (Sigma-Aldrich, ≥99.0%), HAuCl<sub>4</sub>·3H<sub>2</sub>O (Sigma-Aldrich, 99.9%), H<sub>2</sub>PtCl<sub>6</sub>·xH<sub>2</sub>O (Alfa Aesar, 99.9%), tetra-*n*-octylammonium bromide (TOABr, Sigma-Aldrich, 98%), NaBH<sub>4</sub> (Sigma-Aldrich, 99%), 2,4-dimethylbenzenethiol (Sigma-Aldrich, 95%), *n*-butanethiol (Aldrich, 99.8%), dichloromethane (DCM, Sigma-Aldrich, ≥99.9%), tetrahydrofuran (THF, Sigma-Aldrich, 99.9%), toluene (Sigma-Aldrich, 99.7%), ethyl acetate (Sigma-Aldrich, 99.9%), methanol (Sigma-Aldrich, 99.8%), acetonitrile (Carlo Erba RS), hexane (Aldrich, ≥99%), pentane (Sigma-Aldrich, 99.8%), butyronitrile (Sigma-Aldrich, ≥99.0%), propionitrile (Sigma-Aldrich, 99%) were used as received.

[*n*-Oct<sub>4</sub>N<sup>+</sup>][Ag<sub>25</sub>(DMBT)<sub>18</sub><sup>-</sup>] and Au<sub>24</sub>Pt(SC<sub>4</sub>H<sub>9</sub>)<sub>18</sub> were synthesized according to procedure described previously [1,2].

[*n*-Oct<sub>4</sub>N<sup>+</sup>]<sub>2</sub>[Ag<sub>24</sub>Pt(SPhMe<sub>2</sub>)<sub>18</sub><sup>2-</sup>] was synthesized according to a known procedure [3], with minor modifications. AgNO<sub>3</sub> (60 mg, 0.35 mmol) was dissolved in methanol (10 mL) and ethyl acetate (30 mL), and H<sub>2</sub>PtCl<sub>6</sub>·xH<sub>2</sub>O (8 mg, 0.0155 mmol) dissolved in methanol (10 mL) was added. The solution was vigorously stirred for 15 min and then cooled to 0 °C in an ice bath. 2,4-dimethylbenzenethiol (0.2 mL, 1.5 mmol) and tetra-*n*-octylammonium bromide (241.96 mg, 0.44 mmol) were added under continuous stirring. After 15 min, a NaBH<sub>4</sub> aqueous solution (1 mmol) was added quickly under vigorous stirring. The reaction was allowed to proceed for 12 h at 0 °C, under a nitrogen atmosphere. Afterwards, the aqueous phase was removed, and the organic mixture was washed several times with methanol and then dried. [*n*-Oct<sub>4</sub>N<sup>+</sup>]<sub>2</sub>[Ag<sub>24</sub>Pt(DMBT)<sub>18</sub><sup>2-</sup>] was stored at 4 °C in the dark.

All clusters exhibit the same spectral features already described [1-4]. Figure S7-9 show a comparison of the UV-vis absorption spectra obtained at 77 and 297 K for the three clusters.

[1] M. Medves, L. Sementa, D. Toffoli, G. Fronzoni, K. R. Krishnadas, T. Bürgi, S. Bonacchi, T. Dainese, F. Maran, A. Fortunelli, M. Stener, *J. Chem. Phys.*, 2021, **155**, 084103.

[2] W. Fei, S. Antonello, T. Dainese, A. Dolmella, M. Lahtinen, K. Rissanen, A. Venzo, and F. Maran, *J. Am. Chem. Soc.* 2019, **141**, 16033.

[3] X. Liu, J. Yuan, C. Yao, J. Chen, L. Li, X. Bao, J. Yang, and Z. Wu. *J. Phys. Chem. C* 2017, **121**, 13848.

[4] M. S. Bootharaju, C. P. Joshi, M. R. Parida, O. F. Mohammed, and O. M. Bakr. *Angew. Chem. Int. Ed.* 2016, **55**, 922.

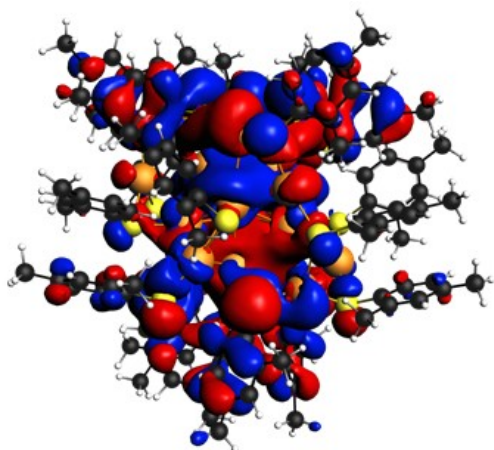

HOMO

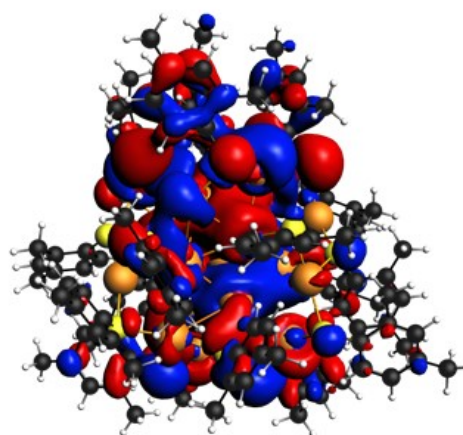

HOMO-1

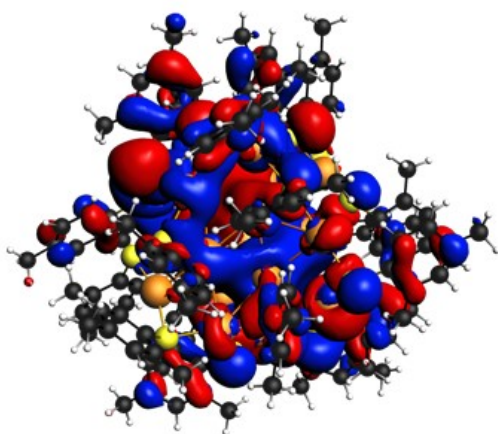

HOMO-2

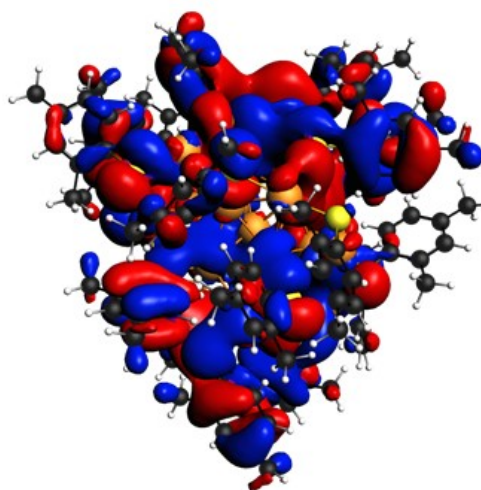

HOMO-20

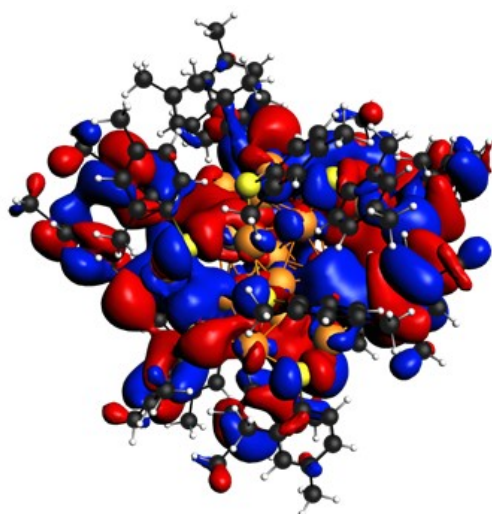

HOMO-21

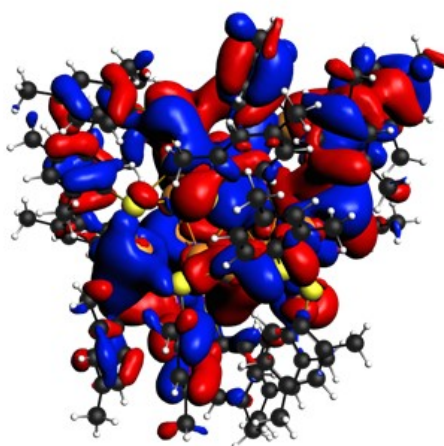

HOMO-23

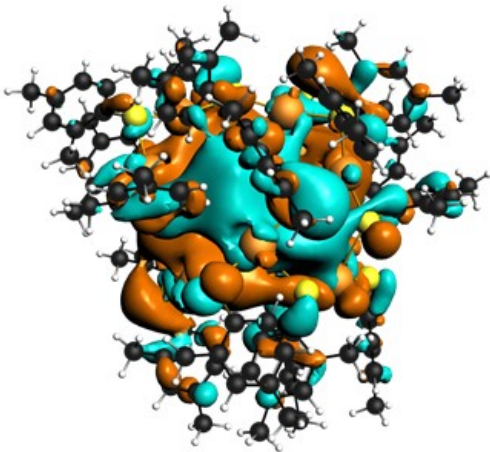

LUMO+2

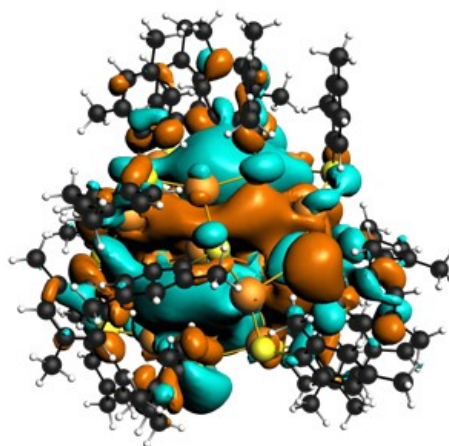

LUMO+3

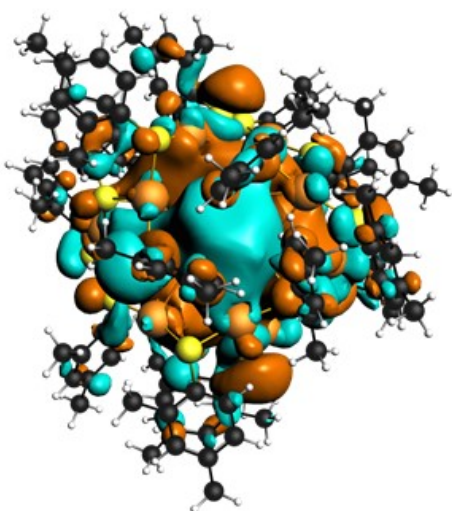

LUMO+4

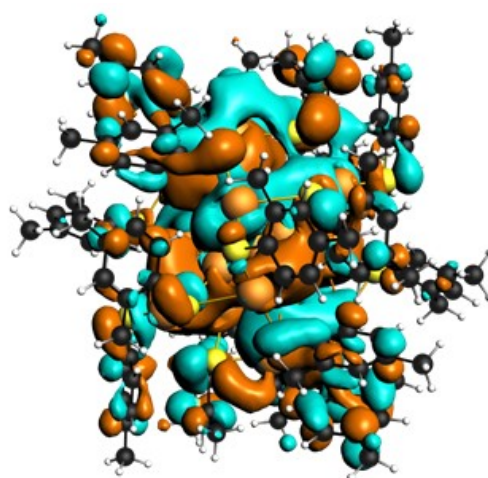

LUMO+8

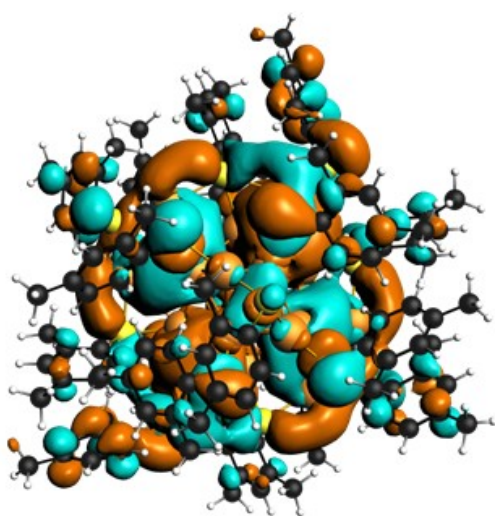

LUMO

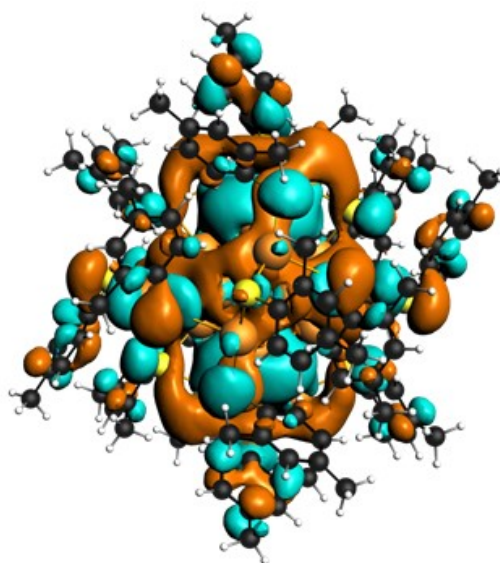

LUMO+1

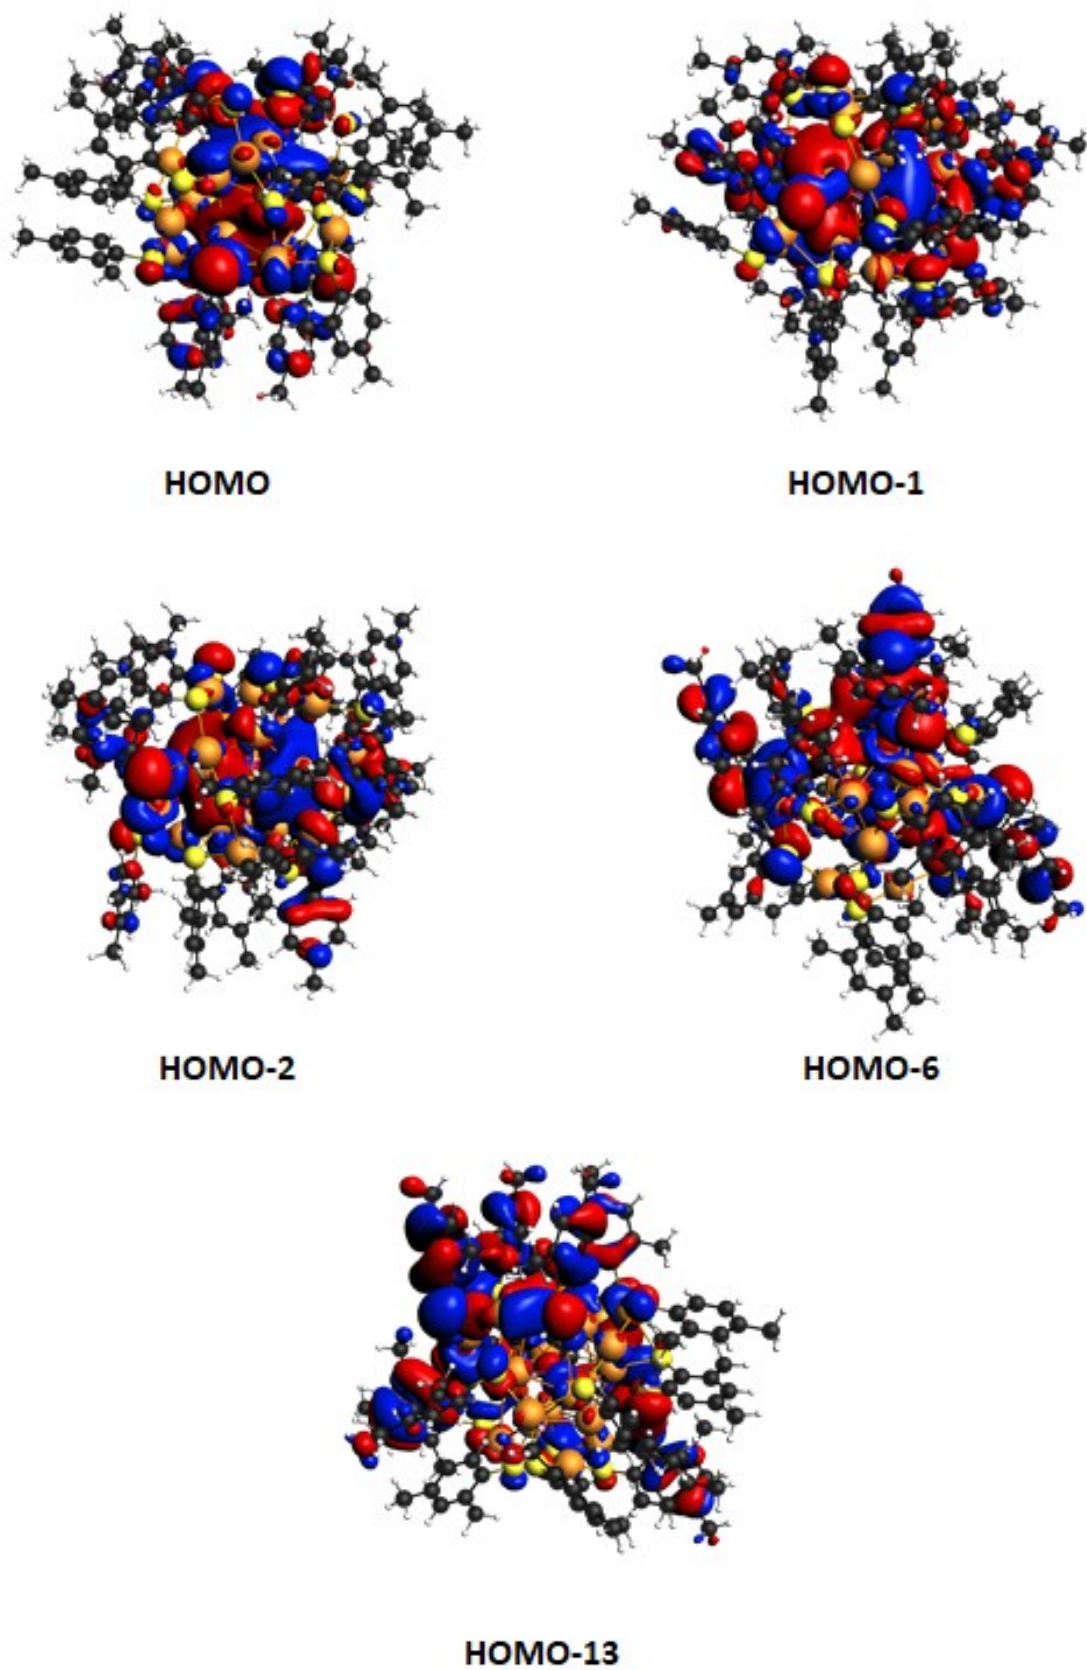

**Figure S3** Occupied molecular orbital most involved in the main spectral features for  $\text{Ag}_{24}\text{Pt}(\text{SR})_{18}^{2-}$ .

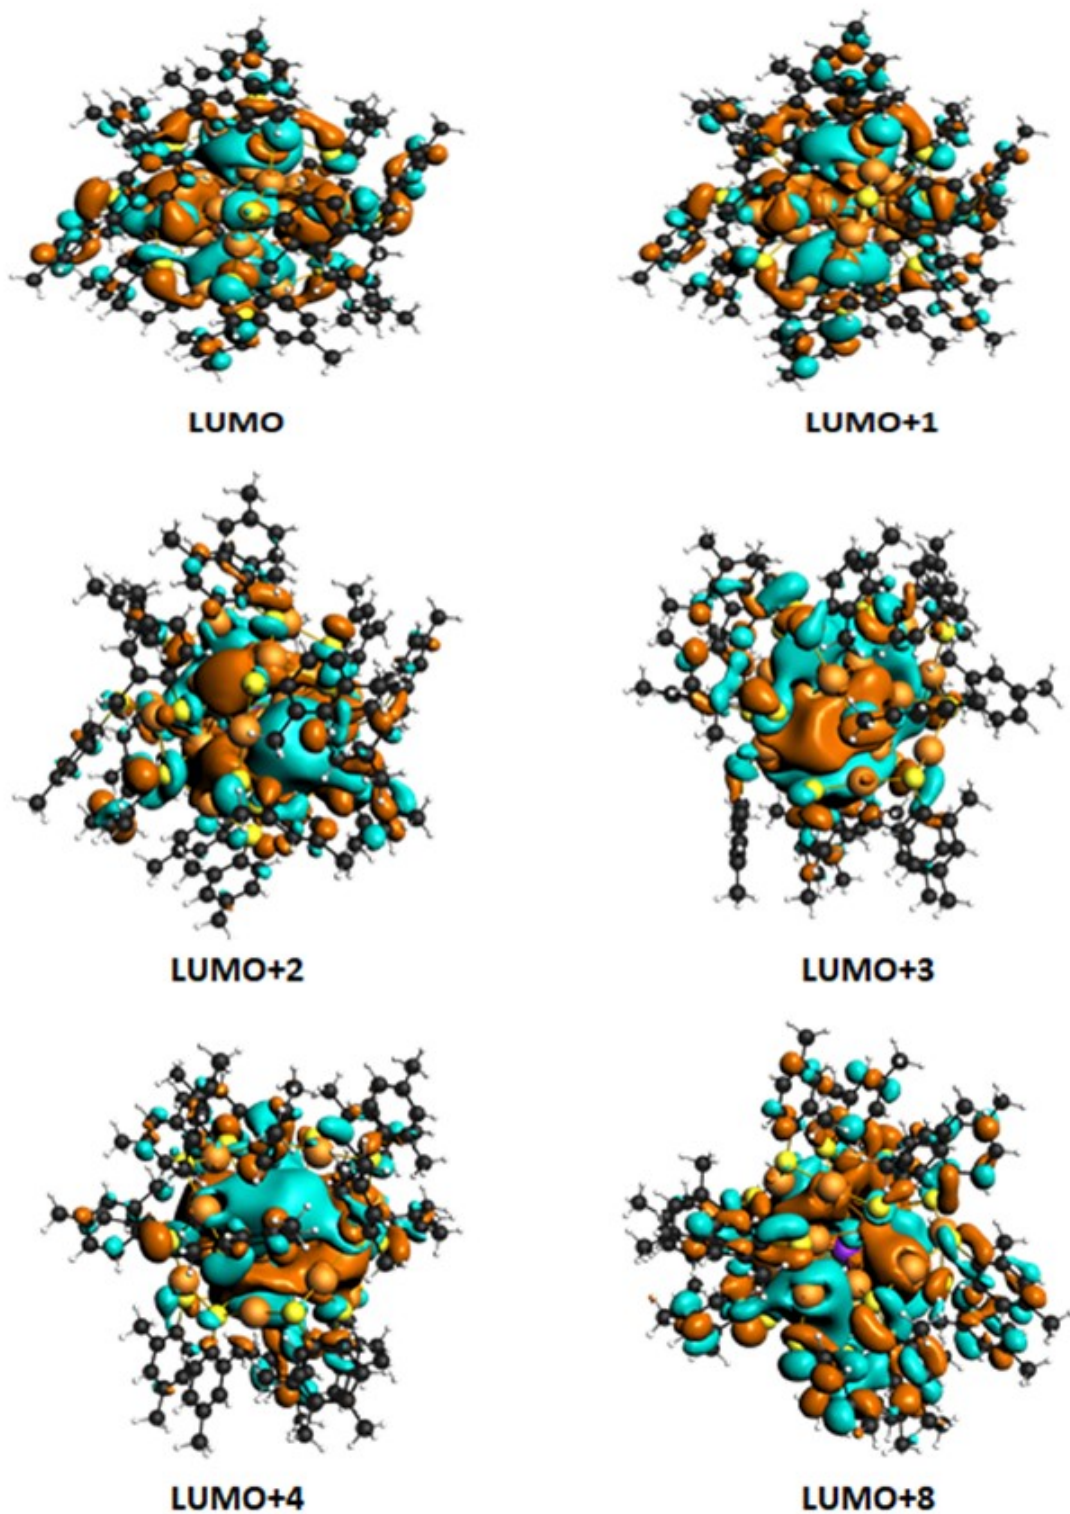

**Figure S4** Virtual molecular orbital most involved in the main spectral features for  $\text{Ag}_{24}\text{Pt}(\text{SR})_{18}^{2-}$ .

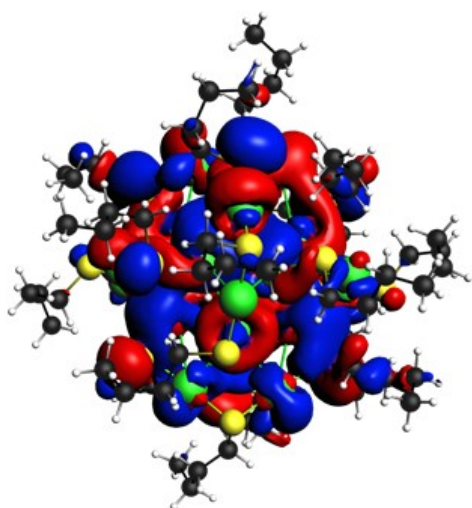

HOMO

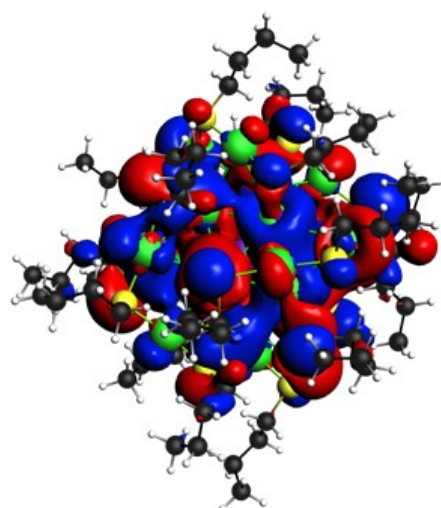

HOMO-1

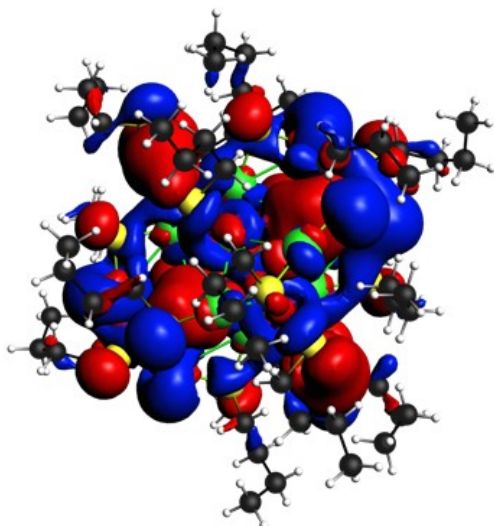

HOMO-3

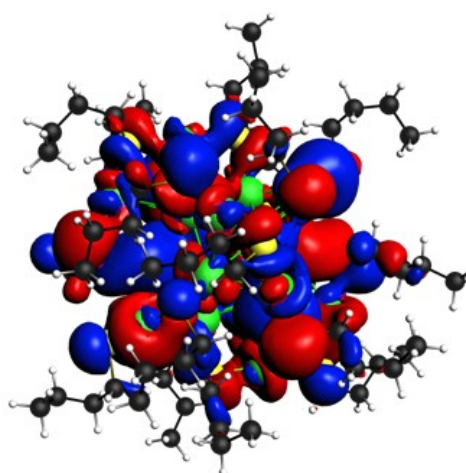

HOMO-6

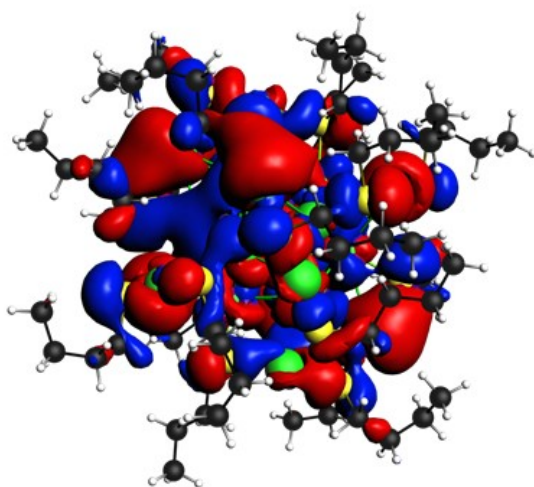

HOMO-8

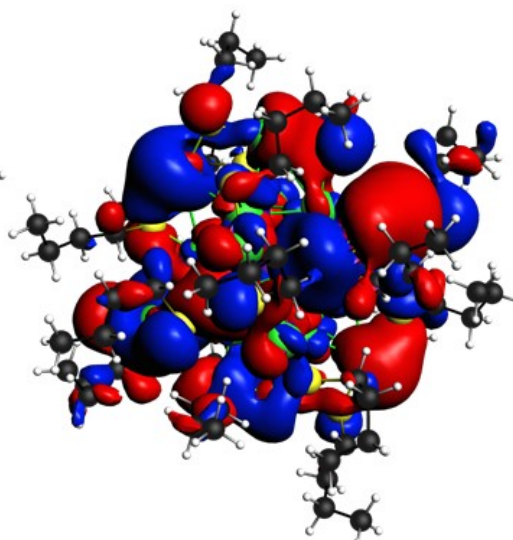

HOMO-14

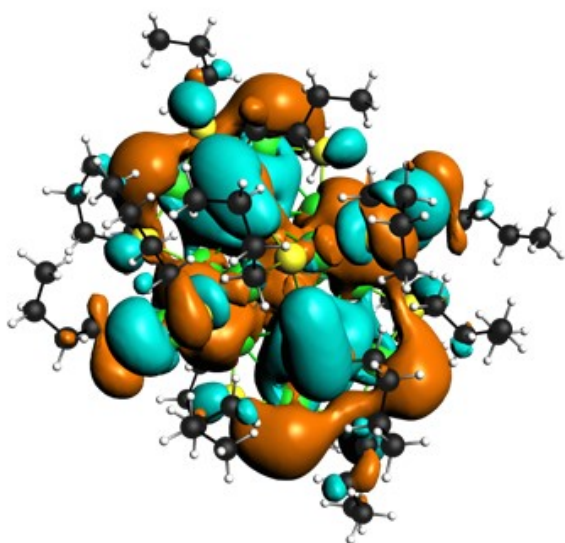

LUMO+2

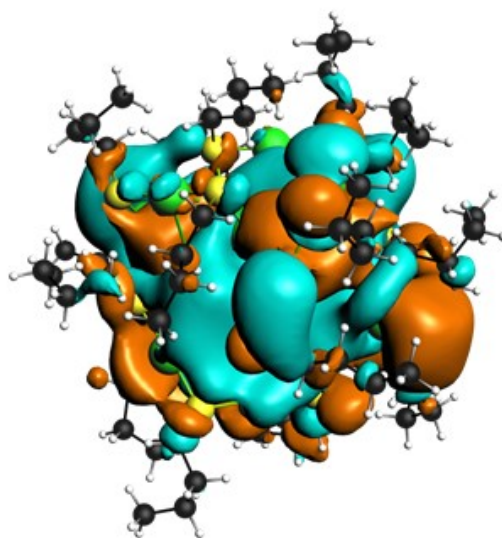

LUMO+7

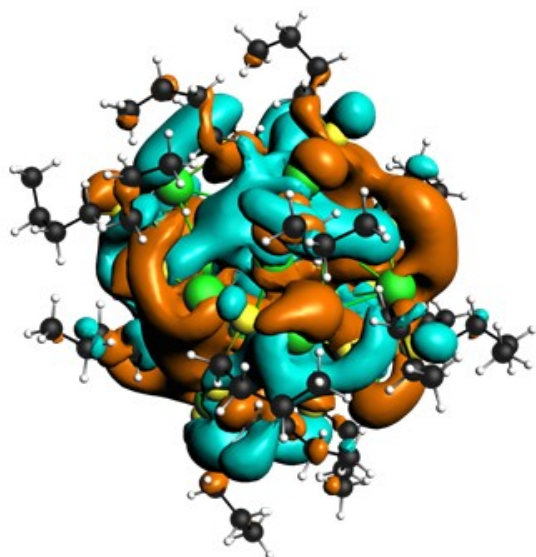

LUMO+8

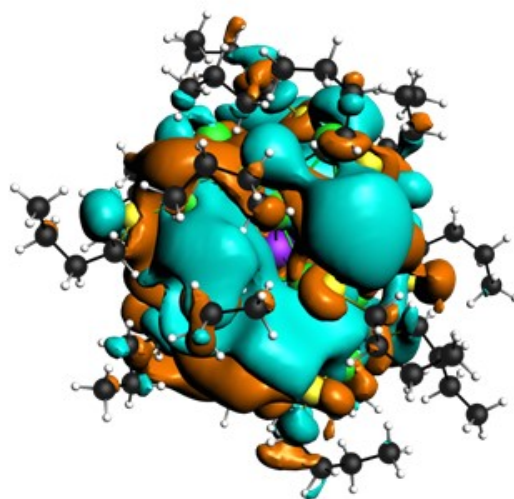

LUMO+9

**Figure S6** Virtual molecular orbital most involved in the main spectral features for  $\text{Au}_{24}\text{Pt}(\text{SC}_4)_{18}$ .



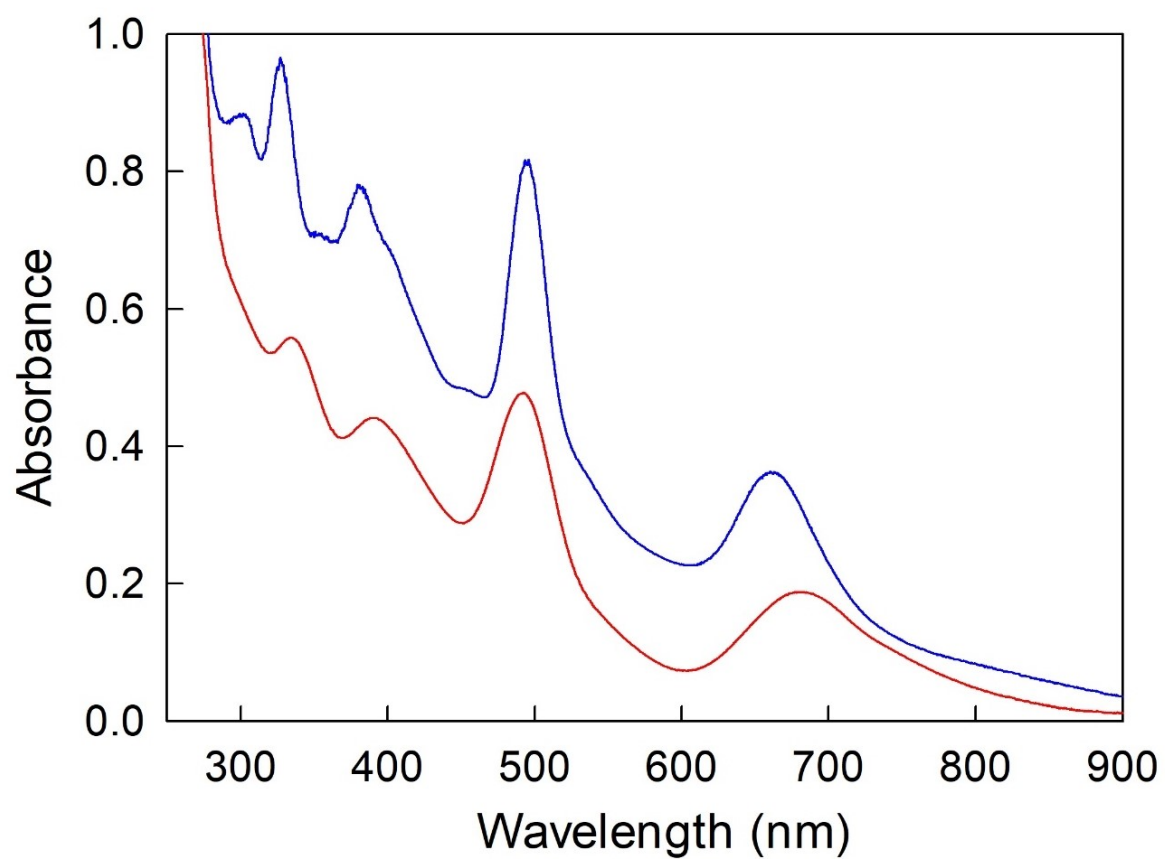

**Figure S7.** Comparison between room-temperature (297 K, red trace) and low-temperature (77 K, blue trace) UV-vis absorption spectra of  $[\text{n-Oct}_4\text{N}^+][\text{Ag}_{25}(\text{SPhMe}_2)_{18}^-]$  in butyronitrile/propionitrile/dichloromethane (5/4/2 v/v/v) in a 1 mm cuvette.

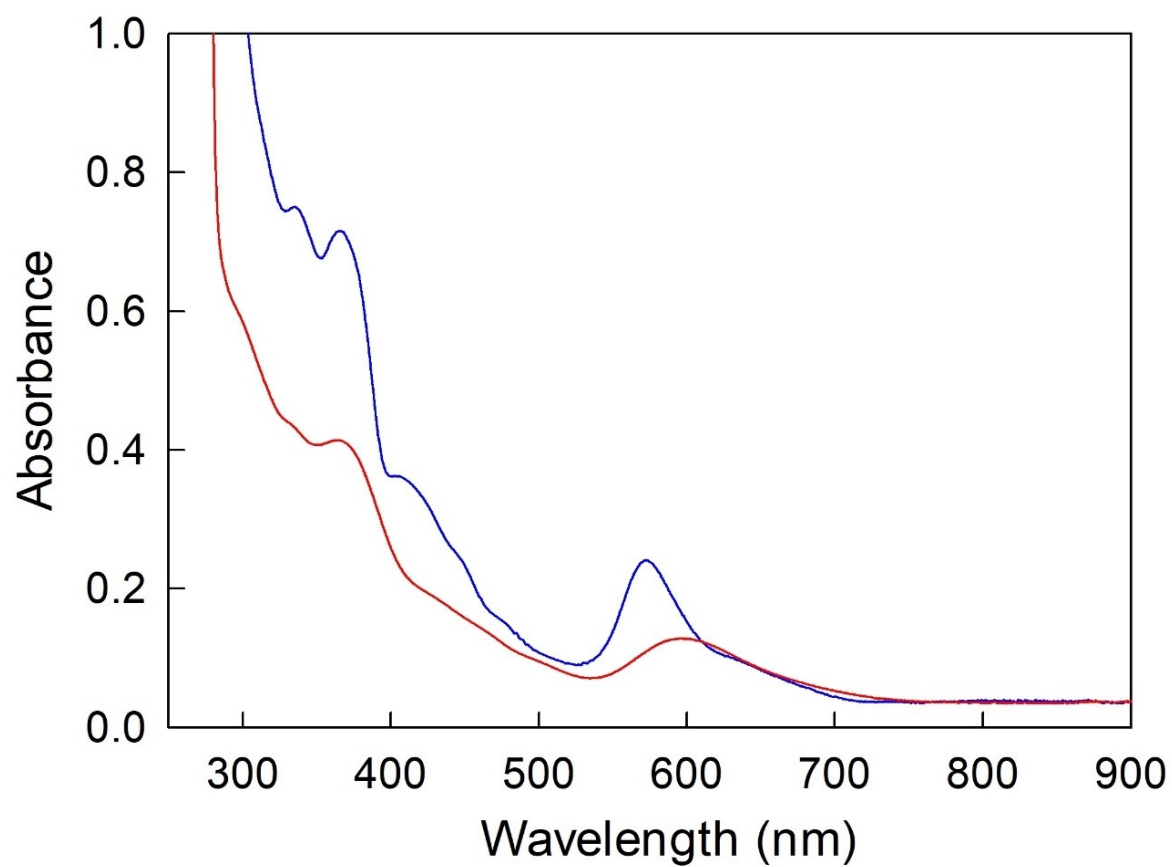

**Figure S8.** Comparison between room-temperature (297 K, red trace) and low-temperature (77 K, blue trace) UV-vis absorption spectra of Au<sub>24</sub>Pt(SC<sub>4</sub>H<sub>9</sub>)<sub>18</sub> in tetrahydrofuran/toluene (1/1 v/v) in a 1 mm cuvette.

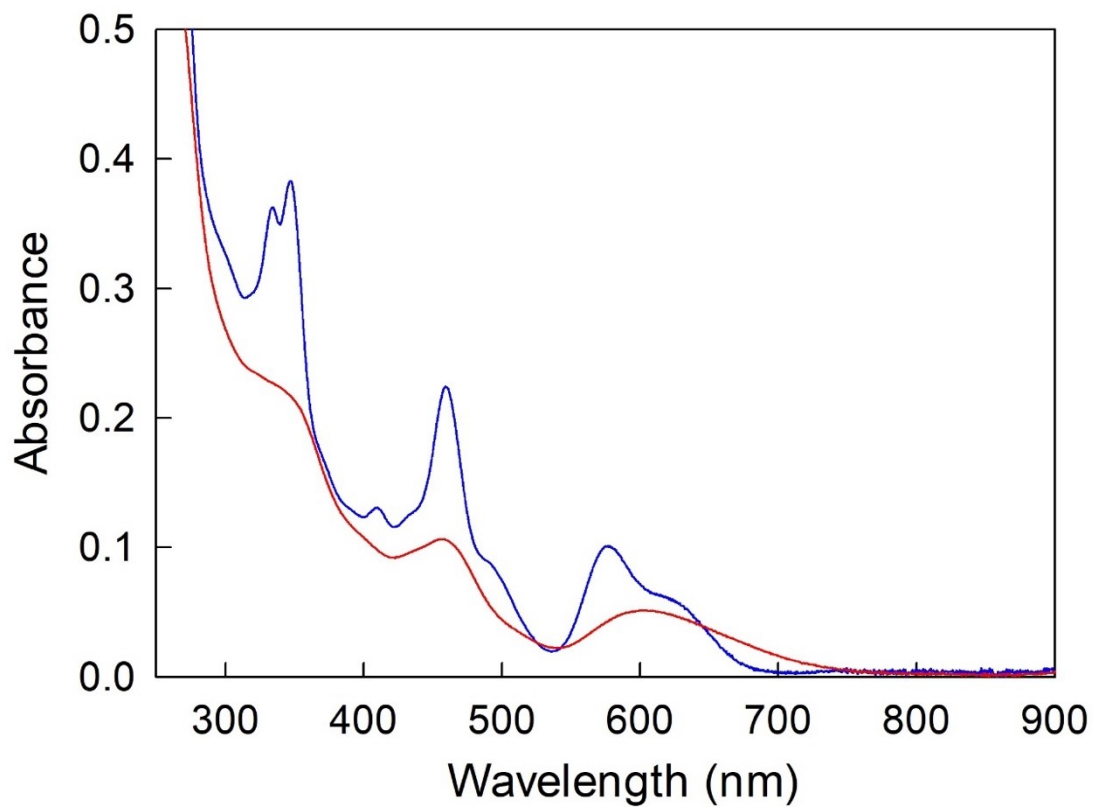

**Figure S9.** Comparison between room-temperature (297 K, red trace) and low-temperature (77 K, blue trace) UV-vis absorption spectra of  $[n\text{-Oct}_4\text{N}^+]_2[\text{Ag}_{24}\text{Pt}(\text{SPhMe}_2)_{18}]^{2-}$  in butyronitrile/propionitrile/dichloromethane (5/4/2 v/v/v) in a 1 mm cuvette.

**Table S1.** Coordinates of the cluster Ag<sub>25</sub>(DMBT)<sub>18</sub><sup>-</sup>.

|    |               |               |               |
|----|---------------|---------------|---------------|
| Ag | 9.7051410000  | 12.7878370000 | 6.9064770000  |
| Ag | 12.2961100000 | 13.6712290000 | 7.1545980000  |
| Ag | 11.4539950000 | 11.2901250000 | 8.4577670000  |
| Ag | 10.0242180000 | 15.5238710000 | 6.9829450000  |
| Ag | 10.4907870000 | 13.8292480000 | 9.3320730000  |
| Ag | 7.9998620000  | 14.3631030000 | 5.3685550000  |
| Ag | 7.1000580000  | 11.9149480000 | 6.7203860000  |
| Ag | 9.3730650000  | 10.0347610000 | 6.7637010000  |
| Ag | 8.5750650000  | 11.5808160000 | 9.1069460000  |
| Ag | 10.7424020000 | 14.0296420000 | 4.6755280000  |
| Ag | 9.0000760000  | 11.6877250000 | 4.4832880000  |
| Ag | 7.7379760000  | 14.1566970000 | 8.3184670000  |
| Ag | 11.6088580000 | 11.2937130000 | 5.5410100000  |
| Ag | 8.4981640000  | 14.0592400000 | 11.3804070000 |
| Ag | 13.0246050000 | 16.0834090000 | 5.7046410000  |
| Ag | 6.9900740000  | 8.8494200000  | 8.0596510000  |
| Ag | 8.4360930000  | 13.6877150000 | 2.3878960000  |
| Ag | 14.2988280000 | 11.4352280000 | 6.7177130000  |
| Ag | 11.7975600000 | 16.6151180000 | 9.0200500000  |
| Ag | 6.4533690000  | 9.7540130000  | 4.9653590000  |
| Ag | 11.5634350000 | 12.1444750000 | 2.6427010000  |
| Ag | 5.1653920000  | 14.2836730000 | 6.1776220000  |
| Ag | 7.2223280000  | 16.8275130000 | 7.3513830000  |
| Ag | 12.2391160000 | 8.6738210000  | 7.2997810000  |
| Ag | 10.3528250000 | 10.9404660000 | 11.2929760000 |
| S  | 5.0005560000  | 16.6667260000 | 6.4845650000  |
| S  | 14.7255400000 | 13.8025240000 | 6.6166460000  |
| S  | 6.5531010000  | 14.8324470000 | 3.3942830000  |
| S  | 7.9648620000  | 9.4517620000  | 10.1817800000 |
| S  | 12.1167420000 | 9.6793240000  | 10.2245590000 |
| S  | 12.6077460000 | 15.1259980000 | 3.5052420000  |
| S  | 9.3894370000  | 17.7855180000 | 7.7898730000  |
| S  | 6.9241420000  | 15.5232050000 | 10.2149340000 |
| S  | 13.5927210000 | 17.4062290000 | 7.6430860000  |
| S  | 13.3309940000 | 10.9869540000 | 3.7809020000  |
| S  | 10.7421300000 | 15.6939710000 | 10.9935200000 |
| S  | 10.0119820000 | 7.7423150000  | 7.4398830000  |
| S  | 7.2678410000  | 10.8434540000 | 2.9651520000  |
| S  | 4.7583320000  | 11.9201090000 | 5.8768290000  |
| S  | 9.0379160000  | 12.2178470000 | 12.8397210000 |
| S  | 5.8942320000  | 7.7765740000  | 6.2206690000  |
| S  | 10.0661260000 | 12.7493730000 | 0.8914170000  |
| S  | 14.6059040000 | 9.1126160000  | 7.1960400000  |
| C  | 4.0021864859  | 17.0223951072 | 7.9233413494  |
| C  | 2.7085531285  | 16.4742558461 | 8.0883851219  |
| C  | 1.9750172369  | 16.8362669548 | 9.2277752218  |
| C  | 2.4627405875  | 17.7149878420 | 10.2025643551 |
| C  | 3.7333030672  | 18.2718187442 | 10.0012544025 |
| C  | 4.4857963571  | 17.9324934714 | 8.8805031349  |

|   |               |               |               |
|---|---------------|---------------|---------------|
| C | 2.1260115442  | 15.4885638052 | 7.1144156912  |
| C | 1.6720378648  | 18.0062024698 | 11.4531602891 |
| C | 15.5665101299 | 14.1962766082 | 8.1461480167  |
| C | 16.9766800176 | 14.0956197325 | 8.2154939882  |
| C | 17.6116449632 | 14.5168564437 | 9.3953822022  |
| C | 16.9098670577 | 15.0270041215 | 10.4975832113 |
| C | 15.5129325216 | 15.0916688904 | 10.4126626698 |
| C | 14.8577960367 | 14.6737090412 | 9.2581799332  |
| C | 17.7830277321 | 13.5322096727 | 7.0758584783  |
| C | 17.6304282865 | 15.4884454902 | 11.7423528665 |
| C | 6.7041818299  | 16.5378942180 | 2.9003791719  |
| C | 6.1225615064  | 16.9457090748 | 1.6744615647  |
| C | 6.1979275815  | 18.3036775857 | 1.3293594484  |
| C | 6.7965580540  | 19.2652799297 | 2.1568062926  |
| C | 7.3571405067  | 18.8354600516 | 3.3666443733  |
| C | 7.3207470789  | 17.4903659277 | 3.7242268316  |
| C | 5.4186071663  | 15.9693856685 | 0.7673781399  |
| C | 6.8194810706  | 20.7247313839 | 1.7711725520  |
| C | 6.5550980793  | 9.7996699049  | 11.2257164903 |
| C | 5.8700511501  | 8.7278343679  | 11.8458828889 |
| C | 4.7995102809  | 9.0363530690  | 12.7000085780 |
| C | 4.3928212819  | 10.3518738130 | 12.9672376147 |
| C | 5.0818252332  | 11.3930509175 | 12.3322852049 |
| C | 6.1395182101  | 11.1158816116 | 11.4718441908 |
| C | 6.2580631355  | 7.2940704890  | 11.5968122261 |
| C | 3.2504078200  | 10.6428342238 | 13.9091929835 |
| C | 13.6821474834 | 10.1927985787 | 10.9089828022 |
| C | 14.2139189149 | 9.4800390626  | 12.0113199585 |
| C | 15.4630543992 | 9.8771180575  | 12.5128409076 |
| C | 16.2152004858 | 10.9157182351 | 11.9453722516 |
| C | 15.6803474879 | 11.5815665865 | 10.8357453122 |
| C | 14.4275171809 | 11.2342818259 | 10.3385489365 |
| C | 13.4942585391 | 8.3020491933  | 12.6141348108 |
| C | 17.5667448304 | 11.2958113522 | 12.4998492890 |
| C | 11.9565221686 | 16.5006759820 | 2.5652217918  |
| C | 12.8546584570 | 17.4427366175 | 2.0052366067  |
| C | 12.3248379691 | 18.4674449504 | 1.2069763775  |
| C | 10.9563587557 | 18.5803874458 | 0.9236209957  |
| C | 10.0880451526 | 17.6474428314 | 1.5027953289  |
| C | 10.5820598527 | 16.6321630615 | 2.3173101031  |
| C | 14.3386149550 | 17.3547377848 | 2.2389944229  |
| C | 10.4382266654 | 19.6568964008 | 0.0022967333  |
| C | 9.6372780017  | 18.9682955617 | 6.4806822969  |
| C | 9.1310647531  | 20.2812401921 | 6.6308148224  |
| C | 9.4167173422  | 21.2164531218 | 5.6236971446  |
| C | 10.1815533061 | 20.9024156396 | 4.4926016958  |
| C | 10.6563013948 | 19.5909181165 | 4.3641807512  |
| C | 10.3817564341 | 18.6397037736 | 5.3382072744  |
| C | 8.3095548887  | 20.6814933915 | 7.8279461051  |
| C | 10.5133909988 | 21.9383257512 | 3.4485869871  |
| C | 5.3277174931  | 14.9194385533 | 10.7268324428 |

|   |               |               |               |
|---|---------------|---------------|---------------|
| C | 4.8129314396  | 15.3020717426 | 11.9910125297 |
| C | 3.5230058055  | 14.8737022900 | 12.3345950536 |
| C | 2.7217219405  | 14.1060629429 | 11.4765992520 |
| C | 3.2611352337  | 13.7290137439 | 10.2414667728 |
| C | 4.5453751758  | 14.1231502446 | 9.8782503366  |
| C | 5.6116043355  | 16.1419147113 | 12.9511681805 |
| C | 1.3106312887  | 13.7289604468 | 11.8540265851 |
| C | 13.3421120001 | 19.1255311941 | 7.2416805436  |
| C | 12.8895793032 | 20.0709634007 | 8.1953873925  |
| C | 12.7955958779 | 21.4130450933 | 7.8018380570  |
| C | 13.1453361038 | 21.8630067281 | 6.5225451481  |
| C | 13.6253748233 | 20.9162370657 | 5.6081329353  |
| C | 13.7167941884 | 19.5736409326 | 5.9627945464  |
| C | 12.5129665823 | 19.6978124127 | 9.6037647884  |
| C | 12.9684009988 | 23.3117715810 | 6.1407777698  |
| C | 13.1420923219 | 9.3534298838  | 3.0835649475  |
| C | 13.8019322261 | 9.0397173609  | 1.8708445361  |
| C | 13.6883114618 | 7.7311781903  | 1.3791251689  |
| C | 12.9619130783 | 6.7303277263  | 2.0397035473  |
| C | 12.2980062373 | 7.0756447388  | 3.2229905731  |
| C | 12.3834057801 | 8.3679596188  | 3.7302568336  |
| C | 14.5913082151 | 10.0716809629 | 1.1126816978  |
| C | 12.8967052171 | 5.3222053898  | 1.5011337297  |
| C | 12.1136501610 | 15.1993102189 | 12.0281891406 |
| C | 12.6983024379 | 16.1388844307 | 12.9074742873 |
| C | 13.7170333330 | 15.6936956493 | 13.7646723544 |
| C | 14.1547161200 | 14.3633588004 | 13.7975375651 |
| C | 13.5581969154 | 13.4519550689 | 12.9148271317 |
| C | 12.5641322147 | 13.8698384365 | 12.0391059894 |
| C | 12.2298934003 | 17.5675816382 | 12.9641705109 |
| C | 15.2177444191 | 13.9030889961 | 14.7613362913 |
| C | 9.7769182756  | 6.7077611997  | 6.0031328201  |
| C | 10.1647703567 | 5.3467491781  | 6.0604770452  |
| C | 9.8974727717  | 4.5374244733  | 4.9448047631  |
| C | 9.2520276834  | 5.0134267673  | 3.7943269548  |
| C | 8.8751610340  | 6.3620823811  | 3.7641205663  |
| C | 9.1439259732  | 7.1924668449  | 4.8479894691  |
| C | 10.8286604263 | 4.7650700906  | 7.2809305527  |
| C | 8.9620828599  | 4.1068130512  | 2.6220099754  |
| C | 7.9548664818  | 9.5576248265  | 1.9425597718  |
| C | 7.0892295348  | 8.7797639608  | 1.1365893869  |
| C | 7.6636069359  | 7.8268067060  | 0.2821999174  |
| C | 9.0483039341  | 7.6245563306  | 0.1910465425  |
| C | 9.8827901214  | 8.4021432116  | 1.0058502438  |
| C | 9.3399349426  | 9.3453443048  | 1.8710592929  |
| C | 5.5948567224  | 8.9509020184  | 1.1937805283  |
| C | 9.6303698531  | 6.6045636074  | -0.7563461953 |
| C | 3.6796916552  | 11.4099554932 | 7.2023320670  |
| C | 2.2800575248  | 11.4587453897 | 7.0039423204  |
| C | 1.4529419544  | 11.0042650825 | 8.0435226875  |
| C | 1.9574443498  | 10.4829072095 | 9.2422122632  |

|   |               |               |               |
|---|---------------|---------------|---------------|
| C | 3.3480667786  | 10.4361634916 | 9.4059881076  |
| C | 4.1922602394  | 10.9094140104 | 8.4082012990  |
| C | 1.6788618955  | 11.9473453530 | 5.7120117424  |
| C | 1.0461483463  | 9.9718079608  | 10.3304019938 |
| C | 10.0784205923 | 12.8296321528 | 14.1473969915 |
| C | 10.8448683240 | 11.9433981220 | 14.9404411750 |
| C | 11.5798803301 | 12.4765897347 | 16.0100765828 |
| C | 11.5849351036 | 13.8393605793 | 16.3270340441 |
| C | 10.8063783473 | 14.6963000871 | 15.5358033593 |
| C | 10.0665722831 | 14.1988705799 | 14.4685930106 |
| C | 10.9137186818 | 10.4697588711 | 14.6523084395 |
| C | 12.4242534927 | 14.3806291034 | 17.4568548838 |
| C | 4.1854705411  | 7.6777714607  | 6.7434564363  |
| C | 3.1021972134  | 7.9417899731  | 5.8714855192  |
| C | 1.7997239900  | 7.7367869217  | 6.3493481202  |
| C | 1.5227689369  | 7.2697861677  | 7.6415580372  |
| C | 2.6106855946  | 6.9939250060  | 8.4794518609  |
| C | 3.9163868985  | 7.1962681557  | 8.0364011419  |
| C | 3.3080476505  | 8.4208770973  | 4.4608990792  |
| C | 0.0986201289  | 7.0996954191  | 8.1101275176  |
| C | 10.9429362509 | 14.0347844505 | 0.0176161162  |
| C | 10.2545676059 | 14.9869126493 | -0.7703017699 |
| C | 11.0087808986 | 15.9349122271 | -1.4750751352 |
| C | 12.4073116480 | 15.9856021665 | -1.4283176365 |
| C | 13.0693824580 | 15.0203826688 | -0.6583734526 |
| C | 12.3487264991 | 14.0602156843 | 0.0468892039  |
| C | 8.7543903450  | 15.0382079186 | -0.8302396874 |
| C | 13.1641896727 | 17.0767701213 | -2.1419098922 |
| C | 15.3188327018 | 8.4485837768  | 5.7049847117  |
| C | 15.1248586028 | 7.0989501610  | 5.3226016732  |
| C | 15.7831160224 | 6.6368358101  | 4.1751558335  |
| C | 16.6227851364 | 7.4445341173  | 3.3972168059  |
| C | 16.8186241535 | 8.7688172366  | 3.8087845596  |
| C | 16.1767335845 | 9.2604086692  | 4.9425021384  |
| C | 14.2226954728 | 6.1684150620  | 6.0834968292  |
| C | 17.2584376102 | 6.9105403307  | 2.1385706471  |
| H | 0.9859997197  | 16.3993806310 | 9.3608554271  |
| H | 4.1416002396  | 18.9685273855 | 10.7310243114 |
| H | 5.4735902575  | 18.3723759401 | 8.7425280004  |
| H | 2.2309021451  | 15.8260067483 | 6.0743227345  |
| H | 1.0644564217  | 15.3077508935 | 7.3218560455  |
| H | 2.6473806740  | 14.5175549261 | 7.1902561376  |
| H | 1.9095296030  | 18.9968236969 | 11.8624132968 |
| H | 1.9054454911  | 17.2625441804 | 12.2322649486 |
| H | 0.5902606499  | 17.9616705841 | 11.2698520876 |
| H | 18.6965025673 | 14.4342271678 | 9.4521348572  |
| H | 14.9278827972 | 15.4488642363 | 11.2575116773 |
| H | 13.7682787873 | 14.7108814309 | 9.2221577935  |
| H | 17.4915743764 | 12.4898744749 | 6.8683973701  |
| H | 18.8556470075 | 13.5519235391 | 7.3031229006  |
| H | 17.6104541947 | 14.0936944795 | 6.1463664760  |

|   |               |               |               |
|---|---------------|---------------|---------------|
| H | 18.6029800848 | 14.9916215232 | 11.8556528145 |
| H | 17.0324706371 | 15.2866507681 | 12.6417001225 |
| H | 17.8182521071 | 16.5728335266 | 11.7125797324 |
| H | 5.7618600381  | 18.6191971269 | 0.3821966598  |
| H | 7.8459474305  | 19.5478174604 | 4.0275239495  |
| H | 7.7882585246  | 17.1696312920 | 4.6553607921  |
| H | 5.0965765325  | 16.4576524396 | -0.1603189105 |
| H | 4.5330048713  | 15.5435706189 | 1.2623538735  |
| H | 6.0630954504  | 15.1162561958 | 0.5087445627  |
| H | 6.8158968984  | 20.8575843477 | 0.6811952444  |
| H | 7.7076194174  | 21.2284580207 | 2.1769331834  |
| H | 5.9373276146  | 21.2519109626 | 2.1666585322  |
| H | 4.2640528047  | 8.2127862148  | 13.1713362620 |
| H | 4.7805021273  | 12.4271471766 | 12.4871342875 |
| H | 6.6420617306  | 11.9413534735 | 10.9658243696 |
| H | 6.1958924575  | 7.0435022606  | 10.5257459872 |
| H | 5.6090828034  | 6.6063070533  | 12.1518949695 |
| H | 7.3012888570  | 7.1068443708  | 11.8908971282 |
| H | 2.5588422106  | 9.7935134937  | 13.9824112269 |
| H | 2.6815700566  | 11.5234637501 | 13.5795861235 |
| H | 3.6181750766  | 10.8557846487 | 14.9248079955 |
| H | 15.8639504912 | 9.3436598262  | 13.3740937149 |
| H | 16.2296940582 | 12.3959116966 | 10.3704366254 |
| H | 14.0125993544 | 11.7928652577 | 9.4986355407  |
| H | 13.4145320769 | 7.4812334908  | 11.8854194303 |
| H | 12.4639010052 | 8.5531628010  | 12.9034441030 |
| H | 14.0233194820 | 7.9285806758  | 13.4991533475 |
| H | 17.7942100790 | 12.3516057238 | 12.2987916958 |
| H | 18.3676581770 | 10.6963066926 | 12.0400264748 |
| H | 17.6204079911 | 11.1317350581 | 13.5842993725 |
| H | 13.0143136634 | 19.1989947178 | 0.7856697921  |
| H | 9.0157840446  | 17.7198167468 | 1.3328498100  |
| H | 9.8872763434  | 15.9236563485 | 2.7717051989  |
| H | 14.5817613887 | 17.3905848381 | 3.3132956735  |
| H | 14.8673496140 | 18.1726353411 | 1.7349479773  |
| H | 14.7376850368 | 16.3984168133 | 1.8692840800  |
| H | 9.4071218833  | 19.9375007235 | 0.2572780947  |
| H | 10.4330376493 | 19.3073133438 | -1.0426710196 |
| H | 11.0621113596 | 20.5600153577 | 0.0387912611  |
| H | 9.0270394683  | 22.2279770387 | 5.7349708826  |
| H | 11.2413368180 | 19.3050111898 | 3.4938634621  |
| H | 10.7564286960 | 17.6225635142 | 5.2167292894  |
| H | 8.8586098986  | 20.5068314440 | 8.7646848103  |
| H | 7.3862674403  | 20.0837309109 | 7.8924412931  |
| H | 8.0309732997  | 21.7409671903 | 7.7778245970  |
| H | 9.8732998677  | 22.8256667612 | 3.5342770178  |
| H | 10.4037288634 | 21.5288865513 | 2.4343188061  |
| H | 11.5583688792 | 22.2710160640 | 3.5496289553  |
| H | 3.1296214181  | 15.1594064965 | 13.3101022664 |
| H | 2.6783923076  | 13.1181583733 | 9.5560095005  |
| H | 4.9504070468  | 13.8147930998 | 8.9132803134  |



|   |               |               |               |
|---|---------------|---------------|---------------|
| H | 6.5367928027  | 15.6262036705 | 13.2566136642 |
| H | 5.0302520598  | 16.3696869973 | 13.8526297272 |
| H | 5.9231707815  | 17.0874566918 | 12.4840633354 |
| H | 1.2040855652  | 13.5768263779 | 12.9366539052 |
| H | 0.9925338590  | 12.8110244371 | 11.3423151045 |
| H | 0.6045109840  | 14.5251481627 | 11.5687381635 |
| H | 12.4365764173 | 22.1374783478 | 8.5320382940  |
| H | 13.9189595736 | 21.2283502458 | 4.6074992570  |
| H | 14.0754346683 | 18.8451072898 | 5.2366870003  |
| H | 11.5763436004 | 19.1123093442 | 9.6263444283  |
| H | 12.3541787642 | 20.5934616004 | 10.2165209841 |
| H | 13.2926091709 | 19.0862708735 | 10.0800088297 |
| H | 13.1962372729 | 23.9834278717 | 6.9792663812  |
| H | 11.9273920317 | 23.5089759603 | 5.8387363118  |
| H | 13.6136473649 | 23.5895136409 | 5.2970398481  |
| H | 14.1867209879 | 7.4900305060  | 0.4405917339  |
| H | 11.6954773959 | 6.3365325374  | 3.7465447421  |
| H | 11.8449703284 | 8.6215282748  | 4.6447801674  |
| H | 15.3818420355 | 10.5044800055 | 1.7422848983  |
| H | 13.9472706893 | 10.9075728731 | 0.7957218778  |
| H | 15.0542557462 | 9.6356799032  | 0.2193337245  |
| H | 11.9490800787 | 4.8366088055  | 1.7716715266  |
| H | 13.7088980887 | 4.7042919408  | 1.9158474879  |
| H | 12.9985723738 | 5.2989694762  | 0.4081273236  |
| H | 14.1737143857 | 16.4163805568 | 14.4402472715 |
| H | 13.8803635396 | 12.4126993386 | 12.9003594023 |
| H | 12.1173979832 | 13.1469349088 | 11.3545913007 |
| H | 12.3008808595 | 18.0549030182 | 11.9804787284 |
| H | 12.8211735315 | 18.1481558688 | 13.6825347861 |
| H | 11.1711775657 | 17.6232652294 | 13.2591136238 |
| H | 14.7712888125 | 13.3019505903 | 15.5689419564 |
| H | 15.7436884251 | 14.7473081910 | 15.2246727402 |
| H | 15.9595140714 | 13.2658507678 | 14.2587805385 |
| H | 10.2034001204 | 3.4922657670  | 4.9836864454  |
| H | 8.3908874729  | 6.7770722386  | 2.8823540316  |
| H | 8.8668213053  | 8.2464599939  | 4.7923607968  |
| H | 11.7414010924 | 5.3194303552  | 7.5468614202  |
| H | 11.0947772678 | 3.7133491133  | 7.1207694371  |
| H | 10.1657375670 | 4.8274739740  | 8.1566583445  |
| H | 9.0280623489  | 4.6556694624  | 1.6723410762  |
| H | 7.9451218478  | 3.6897473818  | 2.6858851618  |
| H | 9.6600296393  | 3.2603857654  | 2.5814424677  |
| H | 7.0000311768  | 7.2214804964  | -0.3343299558 |
| H | 10.9610464646 | 8.2602230627  | 0.9832630305  |
| H | 10.0030339887 | 9.9217496962  | 2.5171179817  |
| H | 5.0933005310  | 8.2771027803  | 0.4888840085  |
| H | 5.3005488384  | 9.9845710083  | 0.9617668003  |
| H | 5.2123372725  | 8.7416650938  | 2.2048251360  |
| H | 10.4642297724 | 6.0607524200  | -0.2900550118 |
| H | 10.0284237278 | 7.0874653576  | -1.6621370752 |
| H | 8.8789819471  | 5.8717305207  | -1.0768381248 |

|   |               |               |               |
|---|---------------|---------------|---------------|
| H | 0.3737028013  | 11.0506709723 | 7.9001755334  |
| H | 3.7757995441  | 10.0483980322 | 10.3269263227 |
| H | 5.2710366168  | 10.9019615816 | 8.5700025333  |
| H | 1.9568414873  | 11.2862409136 | 4.8772816119  |
| H | 2.0430876380  | 12.9506290500 | 5.4459330922  |
| H | 0.5844859994  | 11.9799447708 | 5.7762536778  |
| H | 0.0124917661  | 10.3143109196 | 10.1932846755 |
| H | 1.3909820566  | 10.2974366218 | 11.3221256348 |
| H | 1.0341258345  | 8.8706955421  | 10.3404274086 |
| H | 12.1731147464 | 11.7933276457 | 16.6167230967 |
| H | 10.7868337176 | 15.7631372550 | 15.7497975220 |
| H | 9.4723713801  | 14.8791381659 | 13.8580933957 |
| H | 11.4232847637 | 10.2908711404 | 13.6898284364 |
| H | 9.9134711866  | 10.0232565586 | 14.5635484521 |
| H | 11.4714456436 | 9.9383464657  | 15.4326411903 |
| H | 13.2725160598 | 14.9653398089 | 17.0674663464 |
| H | 12.8341282448 | 13.5749966661 | 18.0791285399 |
| H | 11.8437318869 | 15.0496693825 | 18.1077285573 |
| H | 0.9688238791  | 7.9510743262  | 5.6782856739  |
| H | 2.4388830060  | 6.6211749063  | 9.4876889489  |
| H | 4.7515107853  | 6.9780745499  | 8.7000019714  |
| H | 3.9763698753  | 7.7469541721  | 3.9060059675  |
| H | 3.7756146141  | 9.4200298899  | 4.4416764138  |
| H | 2.3550535458  | 8.4838956415  | 3.9219130253  |
| H | 0.0460097143  | 6.5186856762  | 9.0398898516  |
| H | -0.5165798404 | 6.5894803961  | 7.3559760988  |
| H | -0.3702638871 | 8.0771856828  | 8.3029920827  |
| H | 10.4752145174 | 16.6719058637 | -2.0742416182 |
| H | 14.1564334241 | 15.0210142652 | -0.6047558504 |
| H | 12.8819955782 | 13.3191214280 | 0.6428181302  |
| H | 8.3143653534  | 14.0493134853 | -1.0182880025 |
| H | 8.4119639252  | 15.7315157492 | -1.6078339071 |
| H | 8.3464505147  | 15.3908703542 | 0.1332420119  |
| H | 14.1852551745 | 16.7639872789 | -2.3961077853 |
| H | 13.2426870653 | 17.9686991077 | -1.4995979624 |
| H | 12.6590569065 | 17.3831348612 | -3.0675019909 |
| H | 15.6223313519 | 5.6025981172  | 3.8736120616  |
| H | 17.4752575627 | 9.4222513103  | 3.2372161596  |
| H | 16.3383466628 | 10.2937475971 | 5.2491365330  |
| H | 14.3041071321 | 5.1423809145  | 5.7053294527  |
| H | 13.1689026117 | 6.4785629389  | 5.9767817934  |
| H | 14.4483045407 | 6.1684049564  | 7.1589325746  |
| H | 18.1425649482 | 7.4943403739  | 1.8519337323  |
| H | 16.5462153068 | 6.9551260977  | 1.2989940851  |
| H | 17.5626735691 | 5.8611504689  | 2.2506864035  |

**Table S2.** Coordinates of the cluster  $\text{Ag}_{24}\text{Pt}(\text{DMBT})_{18}^{2-}$ .

|    |             |             |             |
|----|-------------|-------------|-------------|
| Pt | 13.52185104 | 16.13425176 | 20.91360012 |
| Ag | 14.46235904 | 13.85480976 | 19.71394812 |
| Ag | 15.98960804 | 16.41321076 | 19.72697212 |
| Ag | 13.60193004 | 16.14609176 | 18.14875812 |
| Ag | 12.60831304 | 18.40891676 | 22.12511812 |
| Ag | 15.59441504 | 14.84227676 | 22.13524712 |
| Ag | 11.38703304 | 17.37679076 | 19.67950712 |
| Ag | 11.03109104 | 15.89953576 | 22.09907012 |
| Ag | 13.45198204 | 16.16520076 | 23.68365212 |
| Ag | 14.07544704 | 18.50051876 | 19.64882812 |
| Ag | 15.35743604 | 17.72470976 | 22.23770312 |
| Ag | 11.67234304 | 14.57557376 | 19.63956712 |
| Ag | 12.99525104 | 13.74492876 | 22.18705412 |
| Ag | 10.56211104 | 17.28103576 | 24.72354312 |
| Ag | 17.83459404 | 14.17551776 | 20.26153412 |
| Ag | 15.72659104 | 14.21560676 | 17.09844712 |
| Ag | 16.68031204 | 16.01959376 | 24.52818312 |
| Ag | 10.96547204 | 15.92404576 | 16.72972512 |
| Ag | 14.30836304 | 13.67119076 | 25.31540912 |
| Ag | 12.17304604 | 19.16623876 | 17.43244012 |
| Ag | 17.43408704 | 19.15709876 | 20.62331012 |
| Ag | 12.35764700 | 11.68593300 | 19.60858700 |
| Ag | 9.80616504  | 19.01273876 | 21.76826112 |
| Ag | 14.39079204 | 20.84185876 | 21.29592512 |
| Ag | 10.27950200 | 12.90313200 | 22.64780100 |
| S  | 17.98429504 | 13.78896476 | 17.86078312 |
| S  | 18.37196704 | 17.13750576 | 19.64680312 |
| S  | 9.26652600  | 14.92833300 | 23.56584500 |
| S  | 10.61932504 | 13.68593876 | 17.59972512 |
| S  | 17.45358804 | 18.11604176 | 23.50015912 |
| S  | 13.66845304 | 20.71307676 | 18.54439712 |
| S  | 13.88393804 | 15.19227376 | 15.85914512 |
| S  | 12.30766504 | 15.98947576 | 25.86183712 |
| S  | 14.44401700 | 11.74263900 | 18.38028300 |
| S  | 17.92815504 | 14.27999776 | 22.72103612 |
| S  | 11.07305604 | 18.04957376 | 15.60590112 |
| S  | 9.75904404  | 19.19199476 | 19.34348912 |
| S  | 12.11660604 | 20.84165176 | 22.20297212 |
| S  | 16.09426404 | 14.76355376 | 26.53126912 |
| S  | 8.82184804  | 18.78695476 | 23.96902112 |
| S  | 10.28681400 | 11.34528400 | 20.78566300 |
| S  | 16.77237604 | 21.35636476 | 21.30750212 |
| S  | 12.51413304 | 12.41224276 | 24.26133712 |
| C  | 18.26048941 | 12.06040839 | 17.60985042 |
| C  | 18.78653322 | 17.50428943 | 17.96593803 |
| C  | 15.40109980 | 15.90393978 | 13.64297100 |
| C  | 14.64908370 | 17.73511034 | 15.01511672 |
| C  | 17.93991792 | 17.17222285 | 16.89340056 |
| C  | 17.98194465 | 22.56625009 | 19.07179447 |

C 16.88336630 22.49753671 19.95627404  
C 15.85002225 23.44001416 19.76980468  
C 15.87493796 24.37422758 18.73983993  
C 16.96701339 24.39120038 17.86653505  
C 18.02654857 23.49949275 18.03084202  
C 17.44289655 13.62363492 26.69259616  
C 9.47518748 18.81435311 15.58337080  
C 13.06884952 17.12356748 26.99210418  
C 15.19679069 18.65275589 14.12301212  
C 20.04444499 18.06978045 17.65116473  
C 14.28570490 17.76580975 26.70154423  
C 16.89118006 11.84197280 23.59706726  
C 7.56827708 14.64655605 23.15003707  
C 14.71475159 16.34663460 14.79841473  
C 8.24773197 13.62880997 19.06566921  
C 15.95995862 16.80938232 12.73485786  
C 12.50911646 17.35055842 28.27119268  
C 8.03675054 17.29713904 18.26700693  
C 18.31601641 17.36444513 15.56879028  
C 14.76338069 21.94349948 16.31937707  
C 12.44231590 21.36037266 23.86846169  
C 9.33284609 20.16296839 15.96871410  
C 19.29117072 11.97271031 23.41514391  
C 15.77579082 22.22466730 15.39741637  
C 8.03672720 13.23938507 16.69708293  
C 14.93145963 20.96281949 17.32335226  
C 16.46216071 10.83784309 20.07294983  
C 13.13903917 18.17538425 29.20895070  
C 17.28899153 12.27283153 27.07624027  
C 15.84521189 18.18223610 12.97723348  
C 8.31424647 18.14494887 15.14059819  
C 17.17242044 20.53311313 16.44151321  
C 17.24968163 9.87483183 20.69384264  
C 6.89765352 13.60865264 23.83325548  
C 19.21624072 11.32344297 18.34472720  
C 16.24522363 20.34329615 24.64659310  
C 14.35866475 18.77462571 28.88203614  
C 8.86529832 13.53555194 17.80531501  
C 15.41166436 10.50340992 19.20203350  
C 18.11588823 19.41703851 25.85172451  
C 20.43317731 18.28858918 16.32600332  
C 19.56647602 17.92458469 15.29152739  
C 18.02863430 12.59131304 23.25314237  
C 6.96471932 20.09548088 15.56635447  
C 18.76186392 14.09212658 26.51532727  
C 6.88120751 13.42911960 19.23296047  
C 5.45911357 15.14086156 21.99682210  
C 6.81494792 15.40439071 22.23158866  
C 19.40589687 10.66506961 23.89580973  
C 15.18013627 9.12842434 18.97058822  
C 8.17819679 18.55366671 18.88143767

|   |             |             |             |
|---|-------------|-------------|-------------|
| C | 7.06551867  | 18.77339064 | 15.13337081 |
| C | 5.55526198  | 13.32444510 | 23.60796373 |
| C | 14.93847371 | 18.57258330 | 27.62755021 |
| C | 4.83938227  | 14.09590048 | 22.68253350 |
| C | 17.23327557 | 19.34616581 | 24.74769439 |
| C | 12.59891215 | 22.73094884 | 24.17601590 |
| C | 16.14905098 | 20.26038646 | 17.34405568 |
| C | 18.39195459 | 11.43224730 | 27.25746249 |
| C | 17.71924071 | 10.00025024 | 16.39337082 |
| C | 17.54228669 | 11.36205106 | 16.61682234 |
| C | 16.98719581 | 8.52599875  | 20.44693978 |
| C | 5.74561103  | 18.81183777 | 18.74767757 |
| C | 12.50934276 | 20.44813931 | 24.93662579 |
| C | 16.15144853 | 21.38669750 | 25.56162998 |
| C | 9.04693538  | 20.40826828 | 24.64833505 |
| C | 9.31070881  | 20.64650525 | 26.01516196 |
| C | 9.44387763  | 21.94407400 | 26.51841428 |
| C | 9.31319867  | 23.03093027 | 25.65340839 |
| C | 9.03071075  | 22.83756472 | 24.29707955 |
| C | 8.89331427  | 21.53927173 | 23.81648315 |
| C | 8.09927397  | 20.80555409 | 15.97175873 |
| C | 17.05819056 | 21.44353316 | 26.62435238 |
| C | 16.98286110 | 21.52575387 | 15.47852421 |
| C | 19.87221700 | 13.27159866 | 26.69026236 |
| C | 12.68643114 | 20.86233503 | 26.25164526 |
| C | 6.08766657  | 13.15619881 | 18.11484746 |
| C | 16.98670528 | 10.54590557 | 24.09342473 |
| C | 18.24775540 | 9.96644731  | 24.24508628 |
| C | 18.03392062 | 20.45463620 | 26.78481218 |
| C | 19.67721501 | 11.93776947 | 27.05937125 |
| C | 12.78284537 | 23.16761444 | 25.49068176 |
| C | 12.80768486 | 22.22640482 | 26.52292891 |
| C | 6.79784107  | 16.78854140 | 17.90007968 |
| C | 7.00148697  | 19.30549316 | 19.10637770 |
| C | 19.41540333 | 9.95780079  | 18.12958258 |
| C | 6.65602890  | 13.06403045 | 16.84132026 |
| C | 5.65552905  | 17.55189117 | 18.14891602 |
| C | 15.95349085 | 8.14220127  | 19.58826362 |
| C | 18.65266591 | 9.30003668  | 17.16404269 |
| C | 10.52871830 | 9.73358800  | 21.49450139 |
| C | 11.27143872 | 8.76459897  | 20.78639669 |
| C | 11.47668933 | 7.47620835  | 21.26775743 |
| C | 10.92197954 | 7.11258466  | 22.49892127 |
| C | 10.17295481 | 8.03137052  | 23.23548995 |
| C | 9.97952607  | 9.32082314  | 22.72972764 |
| C | 13.81048042 | 8.50847835  | 23.95011716 |
| C | 13.45084048 | 8.02408342  | 25.20824617 |
| C | 12.78681488 | 8.84601493  | 26.12696805 |
| C | 12.50924534 | 10.16529381 | 25.78116716 |
| C | 12.88343222 | 10.70241498 | 24.53299811 |
| C | 13.52199540 | 9.83922759  | 23.62241087 |

|   |             |             |             |
|---|-------------|-------------|-------------|
| H | 14.15234379 | 18.10201893 | 15.91307177 |
| H | 16.95560460 | 16.75609696 | 17.10870565 |
| H | 15.00004380 | 23.42514064 | 20.45159255 |
| H | 15.05290297 | 25.07045902 | 18.60144896 |
| H | 18.86725458 | 23.50757384 | 17.34425789 |
| H | 15.13092539 | 19.71886837 | 14.32067324 |
| H | 14.73109650 | 17.62747633 | 25.71638013 |
| H | 15.90698265 | 12.29057301 | 23.46856247 |
| H | 8.85877592  | 13.87166903 | 19.93413099 |
| H | 16.48590829 | 16.44493716 | 11.85783721 |
| H | 8.93131001  | 16.69839992 | 18.08962176 |
| H | 17.64305741 | 17.09705661 | 14.76040834 |
| H | 10.21772217 | 20.71101993 | 16.29101691 |
| H | 15.62958651 | 22.99395596 | 14.64591733 |
| H | 16.65614610 | 11.89268971 | 20.27304055 |
| H | 12.68344299 | 18.33883733 | 30.18059677 |
| H | 18.11262634 | 19.99422795 | 16.49523275 |
| H | 18.05535569 | 10.16819157 | 21.36057444 |
| H | 7.46010344  | 13.01801171 | 24.55319800 |
| H | 15.53273230 | 20.29429847 | 23.82410755 |
| H | 21.40094837 | 18.72993057 | 16.10927646 |
| H | 18.90666613 | 15.13283069 | 26.22860584 |
| H | 6.43095786  | 13.49453732 | 20.21854854 |
| H | 4.91041950  | 15.73078315 | 21.26785576 |
| H | 20.38572711 | 10.21732163 | 24.02711917 |
| H | 6.18234994  | 18.22499711 | 14.82183251 |
| H | 5.06352259  | 12.51131467 | 24.13472757 |
| H | 15.87895659 | 19.05115400 | 27.37514439 |
| H | 16.29947306 | 19.49038181 | 18.10105403 |
| H | 18.24414727 | 10.39108279 | 27.52593928 |
| H | 17.12967851 | 9.48076149  | 15.64318480 |
| H | 16.80905945 | 11.90642669 | 16.02267662 |
| H | 4.85528768  | 19.40622253 | 18.92559101 |
| H | 12.40503816 | 19.38288311 | 24.72682035 |
| H | 15.38014607 | 22.14374421 | 25.45474823 |
| H | 9.67680788  | 22.09918012 | 27.56721707 |
| H | 8.93432178  | 23.69009623 | 23.63112329 |
| H | 8.66914596  | 21.38292352 | 22.76182155 |
| H | 8.01038778  | 21.83615860 | 16.30291929 |
| H | 20.87577378 | 13.65361317 | 26.52779013 |
| H | 12.71292970 | 20.13740905 | 27.05886478 |
| H | 16.09568289 | 9.99379875  | 24.37480033 |
| H | 18.72028670 | 20.48618259 | 27.62530431 |
| H | 12.88162976 | 24.22720013 | 25.70399935 |
| H | 6.71935620  | 15.81326262 | 17.42914230 |
| H | 20.13140501 | 9.40995651  | 18.73402934 |
| H | 6.04148986  | 12.84977743 | 15.97259406 |
| H | 15.75818659 | 7.09304940  | 19.39101407 |
| H | 11.70628712 | 9.03910023  | 19.82549173 |
| H | 12.06285042 | 6.76216218  | 20.69561092 |
| H | 9.74882886  | 7.75425758  | 24.19522388 |

|   |             |             |             |
|---|-------------|-------------|-------------|
| H | 14.32412765 | 7.87273096  | 23.23513965 |
| H | 12.50614908 | 8.45571962  | 27.10122901 |
| H | 12.00451597 | 10.81607378 | 26.49179018 |
| C | 19.99092907 | 18.16015823 | 13.83004023 |
| H | 21.04235817 | 18.35475565 | 13.79094177 |
| H | 19.76742508 | 17.28988933 | 13.24902558 |
| H | 19.45791598 | 18.99950738 | 13.43470489 |
| C | 21.03547600 | 18.45106362 | 18.76654838 |
| H | 20.60354641 | 19.21175607 | 19.38273328 |
| H | 21.25071023 | 17.58884594 | 19.36249711 |
| H | 21.94074459 | 18.81750629 | 18.32938874 |
| C | 19.16038898 | 21.58126979 | 19.18441228 |
| H | 19.33515538 | 21.35049727 | 20.21450972 |
| H | 18.92643625 | 20.68289116 | 18.65235782 |
| H | 20.03836425 | 22.02605185 | 18.76461667 |
| C | 16.99396029 | 25.38448704 | 16.68999118 |
| H | 17.20276776 | 26.36737717 | 17.05772264 |
| H | 17.75463869 | 25.09438520 | 15.99565027 |
| H | 16.04319722 | 25.38183918 | 16.19913217 |
| C | 18.12115057 | 21.86444613 | 14.49812397 |
| H | 17.79058812 | 22.61830167 | 13.81450838 |
| H | 18.96729621 | 22.22502754 | 15.04485846 |
| H | 18.39645648 | 20.98533417 | 13.95381816 |
| C | 13.45075930 | 22.74190909 | 16.21370231 |
| H | 12.72601355 | 22.16715454 | 15.67583540 |
| H | 13.08147259 | 22.95269430 | 17.19558668 |
| H | 13.63277599 | 23.66061737 | 15.69626147 |
| C | 16.46329765 | 19.18010406 | 11.98032349 |
| H | 16.47004538 | 18.74831744 | 11.00133688 |
| H | 15.88321821 | 20.07915539 | 11.96961991 |
| H | 17.46607840 | 19.40616291 | 12.27735575 |
| C | 15.57908844 | 14.40022370 | 13.36233244 |
| H | 16.46470769 | 14.04889386 | 13.84930872 |
| H | 14.73086874 | 13.86498461 | 13.73508228 |
| H | 15.66535629 | 14.24200334 | 12.30761723 |
| C | 19.19752208 | 18.34231734 | 26.06769353 |
| H | 18.77564210 | 17.51273562 | 26.59562482 |
| H | 19.56591002 | 18.01138985 | 25.11918031 |
| H | 20.00253865 | 18.75610505 | 26.63833182 |
| C | 16.99039152 | 22.58627725 | 27.60298951 |
| H | 17.97277360 | 22.79223181 | 28.02820502 |
| H | 16.61825396 | 23.48915843 | 27.11883609 |
| H | 16.31353078 | 22.34050060 | 28.42485517 |
| C | 20.87478085 | 11.03907087 | 27.23127748 |
| H | 21.38597445 | 11.26450834 | 28.16979992 |
| H | 20.57857297 | 9.99013052  | 27.24558519 |
| H | 21.58593838 | 11.19037262 | 26.41774934 |
| C | 15.91986475 | 11.69470767 | 27.31881238 |
| H | 15.27191527 | 12.42122979 | 27.81163268 |
| H | 15.45361418 | 11.41667707 | 26.36689373 |
| H | 15.97840456 | 10.79831458 | 27.93749563 |

|   |             |             |             |
|---|-------------|-------------|-------------|
| C | 18.34132079 | 8.58921317  | 24.84925179 |
| H | 17.86079834 | 7.85004584  | 24.20469386 |
| H | 19.37899587 | 8.29430069  | 25.00191219 |
| H | 17.82515225 | 8.56743472  | 25.81112863 |
| C | 20.52880434 | 12.77551329 | 23.12136673 |
| H | 20.59040043 | 13.01167929 | 22.05692973 |
| H | 20.48744337 | 13.72421110 | 23.66040728 |
| H | 21.42920984 | 12.23615161 | 23.41262601 |
| C | 20.06465224 | 11.98996247 | 19.39308322 |
| H | 20.31705950 | 13.01170718 | 19.10631964 |
| H | 19.51548895 | 12.02409359 | 20.34020502 |
| H | 20.98641136 | 11.43115355 | 19.55878654 |
| C | 18.79886819 | 7.81533328  | 16.95340220 |
| H | 19.17298074 | 7.60676459  | 15.94902047 |
| H | 19.48624172 | 7.37909949  | 17.67779862 |
| H | 17.82830513 | 7.32573798  | 17.05646594 |
| C | 14.12205034 | 8.69451357  | 17.98977046 |
| H | 13.17937937 | 8.49813254  | 18.50615642 |
| H | 13.94403476 | 9.47151894  | 17.24613433 |
| H | 14.42306202 | 7.77796033  | 17.48212976 |
| C | 17.85136783 | 7.47062833  | 21.08332550 |
| H | 18.89218486 | 7.60080220  | 20.78097958 |
| H | 17.80638173 | 7.54559904  | 22.17033478 |
| H | 17.52656611 | 6.47150361  | 20.79326711 |
| C | 9.12259350  | 10.24604554 | 23.55301971 |
| H | 9.75365775  | 10.92652578 | 24.13432118 |
| H | 8.46643349  | 10.84292164 | 22.91870647 |
| H | 8.50655704  | 9.68437347  | 24.25634206 |
| C | 11.11383332 | 5.71489127  | 23.02507029 |
| H | 11.92560957 | 5.69433949  | 23.75468155 |
| H | 10.20880140 | 5.36213178  | 23.52073467 |
| H | 11.36591048 | 5.02587395  | 22.21914952 |
| C | 13.89763570 | 10.31037910 | 22.24756371 |
| H | 13.01178534 | 10.68246405 | 21.72664169 |
| H | 14.62071595 | 11.12698688 | 22.28020648 |
| H | 14.32023891 | 9.49713170  | 21.66053354 |
| C | 13.79837258 | 6.61707668  | 25.61845419 |
| H | 14.40012408 | 6.63113564  | 26.52973256 |
| H | 12.89210776 | 6.04559859  | 25.83121325 |
| H | 14.36036881 | 6.10499500  | 24.83767079 |
| C | 7.45593646  | 16.51355054 | 21.45137177 |
| H | 8.16123030  | 17.06363220 | 22.07435714 |
| H | 8.00819130  | 16.10776893 | 20.59854916 |
| H | 6.70796279  | 17.21015380 | 21.07359227 |
| C | 3.38057382  | 13.81773639 | 22.43064392 |
| H | 2.78070018  | 14.69600234 | 22.67713903 |
| H | 3.21449147  | 13.58598798 | 21.37658016 |
| H | 3.03019704  | 12.97831960 | 23.03031846 |
| C | 7.10330368  | 20.66688849 | 19.74047390 |
| H | 7.13733117  | 20.57179972 | 20.83041607 |
| H | 8.01800264  | 21.16827465 | 19.42090474 |



|   |             |             |             |
|---|-------------|-------------|-------------|
| H | 6.24518407  | 21.28626281 | 19.47762860 |
| C | 4.30352908  | 16.99501422 | 17.78654230 |
| H | 4.36299994  | 16.39083233 | 16.88094777 |
| H | 3.93681742  | 16.35720812 | 18.59474925 |
| H | 3.57980252  | 17.79507075 | 17.63057121 |
| C | 5.61971194  | 20.77402977 | 15.59974522 |
| H | 5.43637347  | 21.29696378 | 14.65828899 |
| H | 4.82096688  | 20.04652812 | 15.74606133 |
| H | 5.57834151  | 21.50677598 | 16.40634087 |
| C | 8.38632761  | 16.71897880 | 14.66842397 |
| H | 9.32370682  | 16.52663498 | 14.14594731 |
| H | 8.32893708  | 16.04685210 | 15.52953133 |
| H | 7.55410864  | 16.48702629 | 14.00328046 |
| C | 8.66972512  | 13.04093540 | 15.34542246 |
| H | 8.93818310  | 14.00063001 | 14.89683416 |
| H | 9.58955771  | 12.46146429 | 15.44804738 |
| H | 7.99158994  | 12.52269385 | 14.66791910 |
| C | 4.60441333  | 12.96079088 | 18.29064226 |
| H | 4.05748119  | 13.32854841 | 17.42209220 |
| H | 4.37534580  | 11.89964649 | 18.41171178 |
| H | 4.24815765  | 13.48651003 | 19.17711931 |
| C | 15.07773325 | 19.63105759 | 29.89062800 |
| H | 14.43094351 | 19.88036250 | 30.73137111 |
| H | 15.95463290 | 19.10345176 | 30.27269797 |
| H | 15.42331071 | 20.55704451 | 29.42880546 |
| C | 11.23382662 | 16.63797955 | 28.63176977 |
| H | 11.35768375 | 15.56300097 | 28.48335806 |
| H | 10.95119481 | 16.82715718 | 29.66660396 |
| H | 10.41853873 | 16.96038295 | 27.98010172 |
| C | 12.56281417 | 23.74247008 | 23.06236051 |
| H | 13.53995820 | 23.79038947 | 22.57154227 |
| H | 11.82739512 | 23.45342055 | 22.31040263 |
| H | 12.31918158 | 24.73580468 | 23.44018247 |
| C | 12.98547188 | 22.67195491 | 27.95065563 |
| H | 12.93687496 | 23.75724994 | 28.03444860 |
| H | 12.21317210 | 22.23493252 | 28.58542954 |
| H | 13.95400481 | 22.33985475 | 28.33052870 |
| C | 9.49316344  | 24.43259210 | 26.17698151 |
| H | 8.52240980  | 24.88478368 | 26.39213794 |
| H | 10.08046831 | 24.43326961 | 27.09543459 |
| H | 9.99850867  | 25.05620692 | 25.43847192 |
| C | 9.46596575  | 19.50390275 | 26.98147901 |
| H | 8.80010106  | 18.67943934 | 26.72493165 |
| H | 10.49593738 | 19.13489011 | 26.95246853 |
| H | 9.25328347  | 19.82637619 | 28.00160472 |

**Table S3.** Coordinates of the cluster Au<sub>24</sub>Pt(SC<sub>4</sub>H<sub>9</sub>)<sub>18</sub>.

|    |               |               |               |
|----|---------------|---------------|---------------|
| Pt | 11.6704390000 | 7.9577070000  | 7.7376600000  |
| Au | 13.8908360000 | 9.1653750000  | 8.8562160000  |
| Au | 13.9844400000 | 7.3771760000  | 6.3164070000  |
| Au | 12.4336250000 | 10.1849640000 | 6.3083600000  |
| Au | 9.7152220000  | 9.5165580000  | 6.4662080000  |
| Au | 11.8330610000 | 8.1907310000  | 10.5035640000 |
| Au | 12.0309730000 | 5.4261820000  | 6.6393770000  |
| Au | 14.8143010000 | 7.8188090000  | 11.5688850000 |
| Au | 13.6348470000 | 5.5253130000  | 3.8151310000  |
| Au | 13.5719460000 | 12.3459690000 | 8.2404530000  |
| Au | 16.5294790000 | 7.5385100000  | 8.4314190000  |
| Au | 14.0581510000 | 8.9877110000  | 3.6289630000  |
| Au | 10.4213250000 | 12.6281530000 | 6.6138420000  |
| Au | 9.4500420000  | 6.7500380000  | 6.6191040000  |
| Au | 9.3564390000  | 8.5382380000  | 9.1589140000  |
| Au | 10.9072530000 | 5.7304490000  | 9.1669610000  |
| Au | 13.6256560000 | 6.3988550000  | 9.0091130000  |
| Au | 11.5078170000 | 7.7246820000  | 4.9717560000  |
| Au | 11.3099050000 | 10.4892320000 | 8.8359440000  |
| Au | 8.5265770000  | 8.0966040000  | 3.9064350000  |
| Au | 9.7060320000  | 10.3901000000 | 11.6601900000 |
| Au | 9.7689320000  | 3.5694440000  | 7.2348670000  |
| Au | 6.8113990000  | 8.3769040000  | 7.0439020000  |
| Au | 9.2827280000  | 6.9277020000  | 11.8463580000 |
| Au | 12.9195530000 | 3.2872600000  | 8.8614780000  |
| S  | 16.9311620000 | 7.8847150000  | 10.6640430000 |
| S  | 12.7655730000 | 7.7611580000  | 12.6340520000 |
| S  | 16.3300810000 | 7.4212510000  | 6.1545350000  |
| S  | 8.6174470000  | 11.5003370000 | 5.7119410000  |
| S  | 13.8267030000 | 11.0271180000 | 4.6317630000  |
| S  | 14.3208630000 | 7.1271590000  | 2.3197510000  |
| S  | 12.9937160000 | 3.7846100000  | 5.1857800000  |
| S  | 15.3349660000 | 11.0152890000 | 8.9462830000  |
| S  | 12.0672120000 | 13.9446480000 | 7.5457660000  |
| S  | 6.4097160000  | 8.0306980000  | 4.8112770000  |
| S  | 10.5753060000 | 8.1542550000  | 2.8412690000  |
| S  | 7.0107980000  | 8.4941620000  | 9.3207860000  |
| S  | 14.7234310000 | 4.4150760000  | 9.7633800000  |
| S  | 9.5141750000  | 4.8882950000  | 10.8435570000 |
| S  | 9.0200160000  | 8.7882550000  | 13.1555700000 |
| S  | 10.3471620000 | 12.1308030000 | 10.2895410000 |
| S  | 8.0059120000  | 4.9001250000  | 6.5290380000  |
| S  | 11.2736660000 | 1.9707650000  | 7.9295540000  |
| C  | 16.7958293514 | 5.7000368252  | 5.6784494103  |
| C  | 16.3335262584 | 4.5762426618  | 6.5981001850  |
| C  | 16.6135303670 | 3.1918712686  | 5.9946388056  |
| C  | 16.1429629623 | 2.0522587487  | 6.9071944834  |
| C  | 8.7848525342  | 11.7035824581 | 3.8806642439  |
| C  | 7.8461149270  | 12.7883723577 | 3.3400447201  |

|   |               |               |               |
|---|---------------|---------------|---------------|
| C | 8.0409436242  | 14.1959419885 | 3.9264392395  |
| C | 12.5515708299 | 11.7855446529 | 3.5257951131  |
| C | 13.1478710326 | 12.3113861685 | 2.2220855727  |
| C | 12.0653095448 | 12.8528443595 | 1.2671165132  |
| C | 11.1349491393 | 11.7647661287 | 0.7078576842  |
| C | 16.1566937207 | 7.0318170789  | 2.0761299633  |
| C | 16.6182042061 | 5.9138544972  | 1.1369240640  |
| C | 16.4388542332 | 4.4706100420  | 1.6634466412  |
| C | 15.2805525502 | 3.7150195191  | 1.0035176361  |
| C | 11.5629635582 | 3.0332928206  | 4.2721780083  |
| C | 11.9342225507 | 2.4370948420  | 2.9151547210  |
| C | 12.9697252044 | 1.3071651162  | 2.9782036163  |
| C | 13.1528922377 | 0.6098856858  | 1.6231483871  |
| C | 16.3256402730 | 10.8738909973 | 7.3847056020  |
| C | 16.6322367788 | 12.2155459227 | 6.7268879306  |
| C | 17.4357626312 | 12.0417070103 | 5.4282605336  |
| C | 17.5563443542 | 13.3595936685 | 4.6520748401  |
| C | 12.9402302961 | 14.7235146182 | 6.1107378217  |
| C | 14.1025950573 | 15.6110804329 | 6.5603932767  |
| C | 13.7279868766 | 16.7121118000 | 7.5660982140  |
| C | 12.6044509522 | 17.6414362603 | 7.0861857026  |
| C | 17.7115736618 | 6.2894584585  | 11.1829217275 |
| C | 19.1339782114 | 6.1570529009  | 10.6327429068 |
| C | 19.6936498804 | 4.7299017492  | 10.7758782619 |
| C | 19.7823240714 | 4.2244070273  | 12.2233691533 |
| C | 12.6909143372 | 9.1521483681  | 13.8484525693 |
| C | 12.8875774059 | 8.6796429371  | 15.2949353057 |
| C | 11.6636111508 | 8.0271734567  | 15.9654806905 |
| C | 11.2966693405 | 6.6184075744  | 15.4736707399 |
| C | 6.5412055645  | 10.2124193090 | 9.7921778202  |
| C | 6.9932573297  | 11.3150760900 | 8.8439694464  |
| C | 6.6286408486  | 12.7144791414 | 9.3548167790  |
| C | 7.0987530247  | 13.8214347094 | 8.4025930799  |
| C | 14.4454527462 | 4.3137718969  | 11.5890016640 |
| C | 14.5358193035 | 2.9030437927  | 12.1841418486 |
| C | 15.9540508633 | 2.3418079568  | 12.3890936601 |
| C | 16.7068522178 | 1.9679400635  | 11.1037366295 |
| C | 10.7116290491 | 4.0762866586  | 12.0109127340 |
| C | 9.9996159146  | 3.4703945377  | 13.2210238244 |
| C | 9.0402562328  | 2.3234285046  | 12.8760726166 |
| C | 8.3088089268  | 1.7726342060  | 14.1067886192 |
| C | 7.2169261956  | 8.9937725907  | 13.5210744705 |
| C | 6.9992053778  | 9.9091897837  | 14.7324077429 |
| C | 7.4564238499  | 11.3685382400 | 14.5649919286 |
| C | 6.7284352425  | 12.1289726535 | 13.4502020735 |
| C | 11.6777443337 | 13.0422960368 | 11.1815193814 |
| C | 12.7637255328 | 12.1805915818 | 11.8209345415 |
| C | 14.0372813775 | 12.9774314505 | 12.1342382952 |
| C | 15.1245287947 | 12.1113215928 | 12.7841942886 |
| C | 7.0155943690  | 4.9406734094  | 8.1118070011  |
| C | 5.5197029893  | 5.0605023798  | 7.8286461860  |

|   |               |               |               |
|---|---------------|---------------|---------------|
| C | 4.7101294767  | 5.3044043963  | 9.1167161910  |
| C | 4.8632940822  | 4.2013713088  | 10.1756076176 |
| C | 10.3814359977 | 1.1798040710  | 9.3449004850  |
| C | 9.1497724426  | 0.3691577456  | 8.9229862796  |
| C | 9.4188862429  | -1.0178648990 | 8.3115762754  |
| C | 10.0544531655 | -1.0189895117 | 6.9115886896  |
| C | 5.6688037240  | 9.6489342064  | 4.3108056680  |
| C | 4.2861238277  | 9.8624147213  | 4.9336501787  |
| C | 3.7874141716  | 11.3109691257 | 4.7620770473  |
| C | 4.4909126470  | 12.3096573443 | 5.6943322322  |
| C | 10.6564748189 | 6.6092761242  | 1.8109117329  |
| C | 11.1077761550 | 6.9386520086  | 0.3876678986  |
| C | 11.3983718629 | 5.6759515684  | -0.4445061306 |
| C | 10.1826750233 | 4.7578160410  | -0.6407611326 |
| C | 9.4208498294  | 14.8057932065 | 3.6494097457  |
| H | 16.3599601689 | 5.5643984512  | 4.6779492484  |
| H | 17.8900680468 | 5.7152056034  | 5.5775399997  |
| H | 15.2540487869 | 4.6879419807  | 6.7820884968  |
| H | 16.8155098123 | 4.6796741531  | 7.5821872459  |
| H | 16.1019883038 | 3.1202696107  | 5.0221841059  |
| H | 17.6887519593 | 3.0904851751  | 5.7841914076  |
| H | 16.6303026361 | 2.0976695216  | 7.8906563212  |
| H | 16.3576902512 | 1.0681280657  | 6.4696384189  |
| H | 15.0580565697 | 2.1145186964  | 7.0819085652  |
| H | 9.8307053912  | 11.9162111312 | 3.6484069886  |
| H | 8.5434901880  | 10.7221222186 | 3.4431445662  |
| H | 7.9896831211  | 12.8206660236 | 2.2471463818  |
| H | 6.8044140753  | 12.4732492059 | 3.5013038611  |
| H | 10.2178384323 | 14.2131717204 | 4.1235059540  |
| H | 11.7937386673 | 11.0173017111 | 3.3421058469  |
| H | 12.0807160523 | 12.5882501282 | 4.1122667524  |
| H | 13.7013323084 | 11.4954488744 | 1.7323808487  |
| H | 13.8838552660 | 13.0972470897 | 2.4479184623  |
| H | 11.4739974728 | 13.6220168806 | 1.7850574777  |
| H | 12.5623578266 | 13.3706029848 | 0.4337831448  |
| H | 10.5723589531 | 11.2456985107 | 1.4950032346  |
| H | 11.7052081395 | 10.9952056503 | 0.1690542799  |
| H | 10.4018800452 | 12.1891305651 | 0.0080022243  |
| H | 16.4121382295 | 8.0142303230  | 1.6576737246  |
| H | 16.6337467004 | 6.9630946140  | 3.0601682614  |
| H | 16.1137939115 | 6.0248819386  | 0.1667110659  |
| H | 17.6851549301 | 6.1070683168  | 0.9413596103  |
| H | 17.3698504610 | 3.9074287941  | 1.5103344059  |
| H | 16.2805419696 | 4.4906011517  | 2.7521079198  |
| H | 14.3240993756 | 4.2280299908  | 1.1756892067  |
| H | 15.1866371962 | 2.6992207617  | 1.4097139597  |
| H | 15.4252597778 | 3.6313026898  | -0.0822311796 |
| H | 11.1762556937 | 2.2608368937  | 4.9519488972  |
| H | 10.7918119901 | 3.8056867497  | 4.1742587727  |
| H | 11.0043284868 | 2.0576794931  | 2.4602732657  |
| H | 12.2953235903 | 3.2383869165  | 2.2511817898  |

|   |               |               |               |
|---|---------------|---------------|---------------|
| H | 13.9273818681 | 1.7158154397  | 3.3321319215  |
| H | 12.6615534851 | 0.5758601784  | 3.7399096244  |
| H | 13.9300351345 | -0.1657449827 | 1.6630691615  |
| H | 13.4398834265 | 1.3253412903  | 0.8402010384  |
| H | 12.2216573574 | 0.1286299688  | 1.2936891499  |
| H | 17.2371246683 | 10.3321349692 | 7.6734953118  |
| H | 15.7631509074 | 10.2338715079 | 6.6953254042  |
| H | 15.6750406265 | 12.7096185319 | 6.4952438172  |
| H | 17.1614603317 | 12.8788023187 | 7.4262996597  |
| H | 18.4317839665 | 11.6364565030 | 5.6562910913  |
| H | 16.9375394638 | 11.2869604915 | 4.8012250111  |
| H | 18.0448649024 | 14.1392116862 | 5.2527238740  |
| H | 16.5631588878 | 13.7382310428 | 4.3708692469  |
| H | 18.1389399685 | 13.2393163413 | 3.7282629721  |
| H | 13.2942226880 | 13.9251611036 | 5.4481768781  |
| H | 12.1698823531 | 15.2956683598 | 5.5786258503  |
| H | 14.5336230912 | 16.0654474934 | 5.6535296503  |
| H | 14.8878956957 | 14.9725125895 | 6.9930768289  |
| H | 13.4356607231 | 16.2437218145 | 8.5164241450  |
| H | 14.6311112145 | 17.2989803370 | 7.7870834051  |
| H | 12.4311610245 | 18.4589452064 | 7.7996786628  |
| H | 11.6533158209 | 17.1029278926 | 6.9756485403  |
| H | 12.8429107017 | 18.0953029355 | 6.1143449429  |
| H | 17.6879953490 | 6.2838127621  | 12.2794285571 |
| H | 17.0786365372 | 5.4707165001  | 10.8188056410 |
| H | 19.1204741090 | 6.4311756736  | 9.5656498828  |
| H | 19.7925564500 | 6.8819295281  | 11.1318450755 |
| H | 19.0693225358 | 4.0436055103  | 10.1848518203 |
| H | 20.6910635522 | 4.6993960332  | 10.3139933017 |
| H | 20.2399026547 | 3.2262885280  | 12.2704530993 |
| H | 18.7905543400 | 4.1473923837  | 12.6897336099 |
| H | 20.3870398555 | 4.8977611229  | 12.8463318636 |
| H | 13.4587749168 | 9.8744443358  | 13.5590967053 |
| H | 11.7104461654 | 9.6269715620  | 13.7132735017 |
| H | 13.1659647675 | 9.5717637792  | 15.8805166605 |
| H | 13.7559504902 | 8.0063966983  | 15.3452785147 |
| H | 11.8565636395 | 7.9866605163  | 17.0479339104 |
| H | 10.7957673009 | 8.6912730881  | 15.8395056173 |
| H | 10.4952736558 | 6.1867636928  | 16.0897467254 |
| H | 12.1583560916 | 5.9390125008  | 15.5208310902 |
| H | 10.9431588169 | 6.6253981198  | 14.4332815886 |
| H | 6.9894979416  | 10.3595751402 | 10.7854182923 |
| H | 5.4479726465  | 10.1958132251 | 9.9029544756  |
| H | 8.0827099944  | 11.2413575687 | 8.7066967789  |
| H | 6.5557850615  | 11.1434062299 | 7.8488615961  |
| H | 7.0838874249  | 12.8646360627 | 10.3452813269 |
| H | 5.5402606654  | 12.7808130775 | 9.5041823168  |
| H | 6.8228650547  | 14.8177672022 | 8.7728023875  |
| H | 8.1926028376  | 13.7953515846 | 8.2830161144  |
| H | 6.6624286669  | 13.7003232335 | 7.4017992240  |
| H | 13.4679447935 | 4.7621257667  | 11.7894530315 |

|   |               |               |               |
|---|---------------|---------------|---------------|
| H | 15.1942322415 | 4.9847488934  | 12.0351410271 |
| H | 13.9382445382 | 2.2148065775  | 11.5657087673 |
| H | 14.0339558376 | 2.9464954142  | 13.1651298243 |
| H | 16.5436069368 | 3.0715465150  | 12.9650645222 |
| H | 15.8799096270 | 1.4517388562  | 13.0316479403 |
| H | 17.6800048545 | 1.5129381807  | 11.3347556382 |
| H | 16.1320000784 | 1.2522935586  | 10.5001303374 |
| H | 16.8890209695 | 2.8431678163  | 10.4670838531 |
| H | 11.4368595528 | 4.8383857436  | 12.3171009335 |
| H | 11.2464857098 | 3.3186770070  | 11.4193048635 |
| H | 10.7715055734 | 3.1117524748  | 13.9213306909 |
| H | 9.4582599944  | 4.2697080478  | 13.7503365872 |
| H | 9.6033492051  | 1.5183917981  | 12.3806917348 |
| H | 8.3091095491  | 2.6761444517  | 12.1341656954 |
| H | 9.0141400119  | 1.3876454975  | 14.8562099143 |
| H | 7.7109011029  | 2.5543333497  | 14.5956003992 |
| H | 7.6270069253  | 0.9524822677  | 13.8430529384 |
| H | 6.8528462461  | 7.9804274603  | 13.7303211636 |
| H | 6.7031639859  | 9.3512160847  | 12.6231049730 |
| H | 7.5077754154  | 9.4652845797  | 15.6012152980 |
| H | 5.9211783717  | 9.8913849803  | 14.9629139494 |
| H | 8.5394743828  | 11.3918501269 | 14.3729257733 |
| H | 7.3082800233  | 11.8844341807 | 15.5250314159 |
| H | 5.6376091333  | 12.0850183245 | 13.5723032244 |
| H | 7.0219319877  | 13.1876227985 | 13.4318986494 |
| H | 6.9730488958  | 11.7185153407 | 12.4611199306 |
| H | 11.1641706939 | 13.6655269570 | 11.9258836251 |
| H | 12.1056526844 | 13.7090178385 | 10.4196748075 |
| H | 13.0141808680 | 11.3510175006 | 11.1412165504 |
| H | 12.3577747331 | 11.7119824657 | 12.7281193718 |
| H | 13.7979212725 | 13.8348718820 | 12.7804908514 |
| H | 14.4180110679 | 13.4008215239 | 11.1913781639 |
| H | 14.8065423473 | 11.7358339247 | 13.7670024080 |
| H | 15.3615783689 | 11.2382698608 | 12.1571326523 |
| H | 16.0566405550 | 12.6728410647 | 12.9343644945 |
| H | 7.3819675539  | 5.7807742491  | 8.7115912197  |
| H | 7.2509870580  | 4.0211213506  | 8.6565902676  |
| H | 5.1686875539  | 4.1518569642  | 7.3183303497  |
| H | 5.3517830552  | 5.8984135776  | 7.1334355615  |
| H | 3.6505577137  | 5.4114639569  | 8.8433399694  |
| H | 5.0140721337  | 6.2717504020  | 9.5421540873  |
| H | 4.1974760281  | 4.3756871479  | 11.0324120515 |
| H | 4.6197014877  | 3.2120374661  | 9.7640874164  |
| H | 5.8888292481  | 4.1523599778  | 10.5678484233 |
| H | 10.0899240715 | 1.9831817226  | 10.0294462023 |
| H | 11.1247985792 | 0.5493768271  | 9.8508044958  |
| H | 8.5369351425  | 0.2391382120  | 9.8305901190  |
| H | 8.5422600894  | 0.9786178384  | 8.2349893071  |
| H | 8.4595501122  | -1.5550016145 | 8.2672438123  |
| H | 10.0468268470 | -1.5965117903 | 9.0049760250  |
| H | 9.4650881858  | -0.4129291287 | 6.2096629866  |

|   |               |               |               |
|---|---------------|---------------|---------------|
| H | 11.0697554825 | -0.6043605258 | 6.9175508520  |
| H | 10.1107199571 | -2.0397369305 | 6.5082441184  |
| H | 5.6224467002  | 9.6447089855  | 3.2142045159  |
| H | 6.3655404330  | 10.4337404460 | 4.6232157831  |
| H | 4.3373782774  | 9.6191837498  | 6.0068584830  |
| H | 3.5738460104  | 9.1524605916  | 4.4899805758  |
| H | 2.7044251004  | 11.3383186574 | 4.9511749777  |
| H | 3.9113973480  | 11.6214410241 | 3.7139587581  |
| H | 4.1425939945  | 13.3376942138 | 5.5247533542  |
| H | 4.3013248416  | 12.0641651889 | 6.7486652154  |
| H | 5.5816965200  | 12.3065352564 | 5.5605558622  |
| H | 9.6684987544  | 6.1396763635  | 1.8372408819  |
| H | 11.3697472460 | 5.9330947986  | 2.3031643212  |
| H | 10.3413791927 | 7.5539238402  | -0.1055278462 |
| H | 12.0192360858 | 7.5523058468  | 0.4412334400  |
| H | 12.2146174809 | 5.1157521164  | 0.0371535196  |
| H | 11.7883335669 | 5.9863858971  | -1.4246805182 |
| H | 9.8278673254  | 4.3408653747  | 0.3115001107  |
| H | 9.3414913213  | 5.3005778122  | -1.0935269917 |
| H | 10.4226724614 | 3.9094052400  | -1.2965536177 |
| H | 7.8719687104  | 14.1586825719 | 5.0127193855  |
| H | 7.2579239836  | 14.8524871555 | 3.5201671194  |
| H | 9.4945648655  | 15.8247160396 | 4.0538694324  |
| H | 9.6325056864  | 14.8563111650 | 2.5723484190  |
